# Supplementary material for: The ER-Mitochondria Tethering Complex VAPB-PTPIP51 Regulates Autophagy
Source: PubMed Central journal article supplement (PMC5300905; doi:10.1016/j.cub.2016.12.038), 2017-02-06
Supplement: mmc2.pdf [file mmc2.pdf]

# Current Biology

## The ER-Mitochondria Tethering Complex VAPB-PTPIP51 Regulates Autophagy

### Graphical Abstract

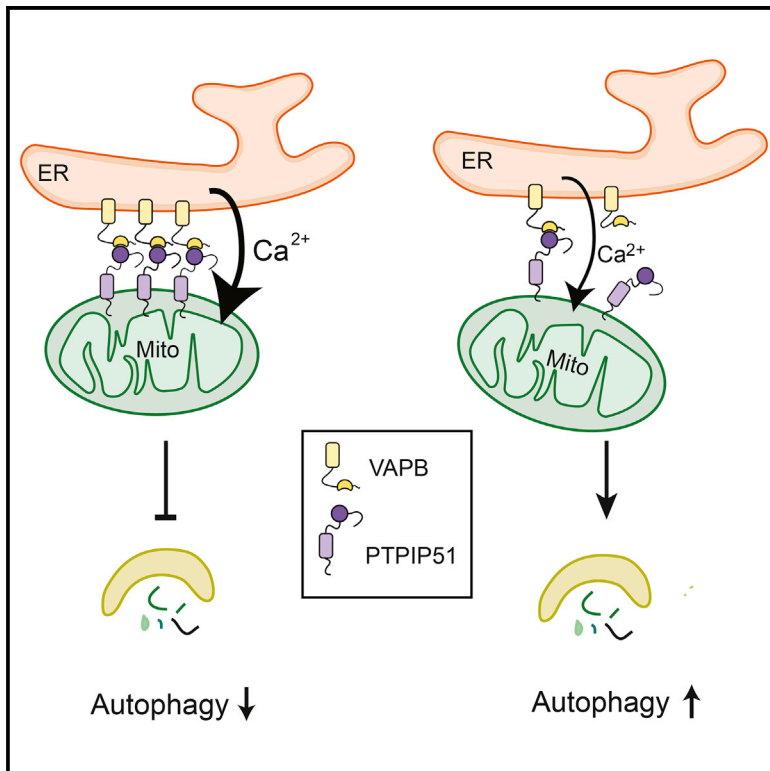

### Authors

Patricia Gomez-Suaga,  
Sebastien Paillusson, Radu Stoica,  
Wendy Noble, Diane P. Hanger,  
Christopher C.J. Miller

### Correspondence

chris.miller@kcl.ac.uk

### In Brief

Tight contacts between ER and mitochondria facilitate IP<sub>3</sub>-receptor-mediated delivery of Ca<sup>2+</sup> to mitochondria. VAPB and PTPIP51 are tethering proteins that mediate formation of these contacts. Gomez-Suaga et al. show that the VAPB-PTPIP51 tethers regulate autophagy and that this involves their role in facilitating ER-mitochondria Ca<sup>2+</sup> exchange.

### Highlights

- Loosening ER-mitochondria contacts by loss of VAPB-PTPIP51 stimulates autophagy
- Tightening ER-mitochondria contacts by increased VAPB-PTPIP51 inhibits autophagy
- Artificial ER-mitochondria tethers rescue VAPB-PTPIP51 loss effects on autophagy
- The effects of VAPB-PTPIP51 involve their role in ER-mitochondria Ca<sup>2+</sup> delivery

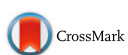

# The ER-Mitochondria Tethering Complex VAPB-PTPIP51 Regulates Autophagy

Patricia Gomez-Suaga,<sup>1</sup> Sebastien Paillusson,<sup>1</sup> Radu Stoica,<sup>1</sup> Wendy Noble,<sup>1</sup> Diane P. Hanger,<sup>1</sup> and Christopher C.J. Miller<sup>1,2,\*</sup>

<sup>1</sup>Department of Basic and Clinical Neuroscience, Institute of Psychiatry, Psychology and Neuroscience, King's College London, London SE5 9RX, UK

<sup>2</sup>Lead Contact

\*Correspondence: [chris.miller@kcl.ac.uk](mailto:chris.miller@kcl.ac.uk)

<http://dx.doi.org/10.1016/j.cub.2016.12.038>

## SUMMARY

Mitochondria form close physical associations with the endoplasmic reticulum (ER) that regulate a number of physiological functions. One mechanism by which regions of ER are recruited to mitochondria involves binding of the ER protein VAPB to the mitochondrial protein PTPIP51, which act as scaffolds to tether the two organelles. Here, we show that the VAPB-PTPIP51 tethers regulate autophagy. We demonstrate that overexpression of VAPB or PTPIP51 to tighten ER-mitochondria contacts impairs, whereas small interfering RNA (siRNA)-mediated loss of VAPB or PTPIP51 to loosen contacts stimulates, autophagosome formation. Moreover, we show that expression of a synthetic linker protein that artificially tethers ER and mitochondria also reduces autophagosome formation, and that this artificial tether rescues the effects of siRNA loss of VAPB or PTPIP51 on autophagy. Thus, these effects of VAPB and PTPIP51 manipulation on autophagy are a consequence of their ER-mitochondria tethering function. Interestingly, we discovered that tightening of ER-mitochondria contacts by overexpression of VAPB or PTPIP51 impairs rapamycin- and torin 1-induced, but not starvation-induced, autophagy. This suggests that the regulation of autophagy by ER-mitochondria signaling is at least partly dependent upon the nature of the autophagic stimulus. Finally, we demonstrate that the mechanism by which the VAPB-PTPIP51 tethers regulate autophagy involves their role in mediating delivery of Ca<sup>2+</sup> to mitochondria from ER stores. Thus, our findings reveal a new molecular mechanism for regulating autophagy.

## INTRODUCTION

Macroautophagy, hereafter termed autophagy, is an evolutionarily conserved cellular process by which cytosolic constituents, including damaged organelles and aggregated proteins, are engulfed within specialized double-membrane vesicles known as

autophagosomes. These then fuse with the endosomal-lysosomal system, and this facilitates degradation of their contents to yield metabolites that can be released into the cytoplasm for recycling [1]. Autophagy occurs at basal levels in virtually all cells, and this autophagic flux permits the removal of cellular components that accumulate during normal cell functions [1]. In addition, autophagy provides a mechanism by which cell components are removed in certain physiological states, such as during development and following nutrient starvation, but is also a key process in some diseases. Indeed, alterations to autophagy are believed to contribute to cancer and neurodegenerative diseases [2].

Autophagosome formation commences with the development of an initial cup-shaped isolation membrane known as the phagophore, which expands to progressively engulf the cytosolic material destined for degradation [1]. Once the phagophore membrane has sealed to surround the target material, the autophagosome fuses with a lysosome (or endosome and then a lysosome) to form an autolysosome, and the contents are then digested to yield metabolites that can be released into the cytoplasm for recycling [1]. Although many aspects of the autophagic process are now becoming clear, the source(s) of the autophagosomal membrane are still not fully known. The plasma membrane, Golgi, mitochondria, and in particular the ER have all been proposed as membrane sources, and indeed, it is possible that all participate in autophagosome formation, depending upon the nature of the cellular content that is destined for destruction [3].

With regard to the endoplasmic reticulum (ER), attention has focused on the precise ER sub-region that might contribute to autophagosome biogenesis. The ER is a dynamic structure organized into distinct domains, which include rough and smooth ER, flat membranes (sheets), and tubules [4]. This dynamic nature facilitates the interaction of ER membranes with other organelle membranes, such as mitochondria, endosomes, the Golgi, peroxisomes, and the plasma membrane [5]. The regions of ER that form associations with mitochondria are termed mitochondria-associated ER membranes (MAM), and these have been the focus of much recent attention. Up to about 20% of the mitochondrial surface is closely apposed (10- to 30-nm distances) to ER membranes, and these contacts regulate many fundamental physiological processes, including Ca<sup>2+</sup> homeostasis, phospholipid metabolism, energy metabolism, mitochondrial biogenesis and trafficking, ER stress and the unfolded protein response (UPR), apoptosis, and inflammatory responses [6, 7].

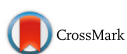

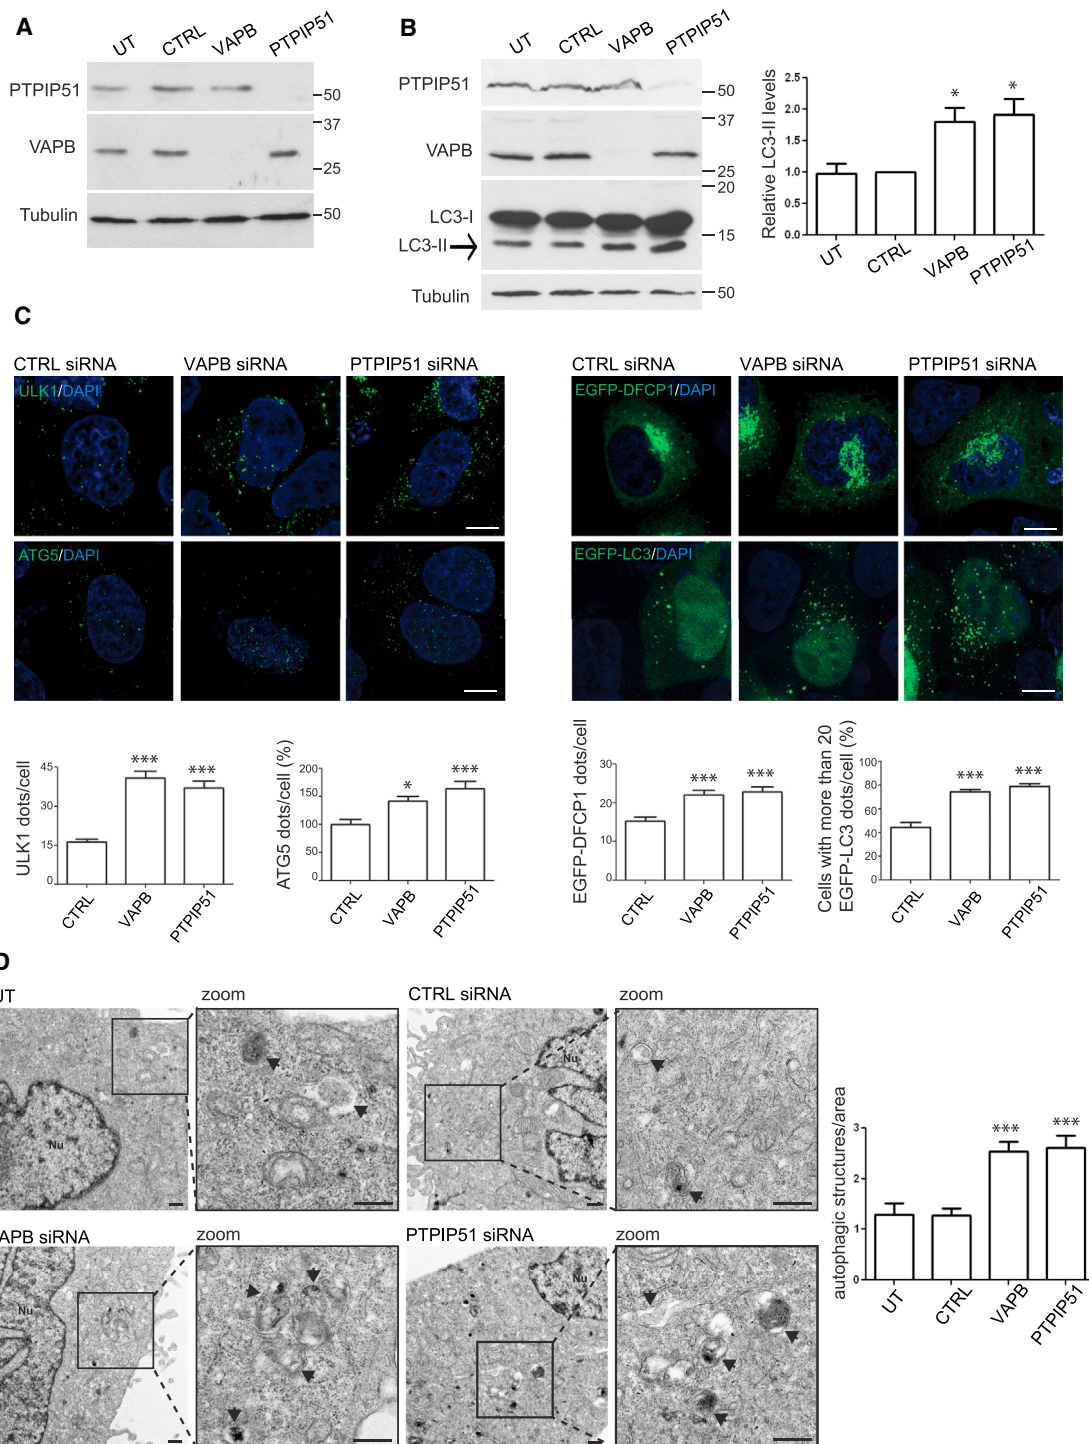

### Figure 1. siRNA Knockdown of VAPB or PTPIP51 Increases Autophagic Structures

(A) Immunoblots showing siRNA knockdown of VAPB and PTPIP51 in HeLa cells. Cells were untreated (UT) or treated with either control (CTRL), VAPB, or PTPIP51 siRNAs and samples probed for PTPIP51, VAPB, or  $\alpha$ -tubulin as a loading control. Protein molecular mass markers are indicated in kD.

(B) siRNA knockdown of VAPB or PTPIP51 increases LC3-II levels in HEK293 cells. Cells were UT or treated with either CTRL, VAPB, or PTPIP51 siRNAs and samples probed for PTPIP51, VAPB, LC3, or  $\alpha$ -tubulin as a loading control. Both LC3-I and LC3-II isoforms are shown; arrow indicates LC3-II isoform. Bar chart shows relative LC3-II levels following quantification of signals from immunoblots. LC3-II levels were normalized to  $\alpha$ -tubulin signals. Protein molecular mass markers are indicated in kD. Data were analyzed by one-way ANOVA and Tukey's post hoc test;  $n = 5$ . Error bars are SEM; \* $p < 0.05$ .

(C) siRNA knockdown of VAPB or PTPIP51 increases autophagic structures in HeLa cells. Cells were transfected with CTRL, VAPB, or PTPIP51 siRNAs and the numbers of ULK1, ATG5, EGFP-DFCP1, and EGFP-LC3 autophagic structures quantified. Representative confocal images of cells are shown with DAPI-labeled nuclei. Bar charts show quantification of autophagic structures. Data were analyzed by one-way ANOVA and Tukey's post hoc test;  $n = 5$ . Error bars are SEM; \*\*\* $p < 0.001$ .

(legend continued on next page)

The mechanisms by which regions of ER come into contact with mitochondria to form MAM are not properly understood, but electron microscopy (EM) studies reveal the presence of structures that appear to tether the two organelles [8]. Recently, the integral ER protein vesicle-associated membrane protein-associated protein B (VAPB) was shown to bind to the outer mitochondrial membrane protein, protein tyrosine phosphatase interacting protein 51 (PTPIP51) to form at least some of these tethers [9]. Evidence to demonstrate that VAPB and PTPIP51 are ER-mitochondria tethers comes from multiple experimental approaches. First, VAPB is an ER protein enriched in MAM, and PTPIP51 is a known outer mitochondrial membrane protein [6, 10]. Second, VAPB and PTPIP51 interact in a large number of different biochemical assays [9–12]. Third, modulating expression of VAPB or PTPIP51 affects  $\text{Ca}^{2+}$  exchange between the two organelles, which is a physiological readout of ER-mitochondria contacts [9, 10]. Finally, manipulating VAPB and/or PTPIP51 expression induces appropriate changes in ER-mitochondria contacts as assayed in the EM; VAPB or PTPIP51 small interfering RNA (siRNA) knockdown decreases, whereas overexpression markedly increases ER-mitochondria contacts [9, 13]. High-resolution imaging, such as EM, is required to properly quantify ER-mitochondria contacts of 10- to 30-nm distances [6].

Here, we address the role of MAM and the VAPB-PTPIP51 tethers in autophagy. We show that experimental manipulation of VAPB and PTPIP51 expression to increase and decrease ER-mitochondria associations impacts markedly upon both basal and chemically induced autophagy. We also show that these effects of VAPB and PTPIP51 on autophagy are dependent upon their ER-mitochondria tethering functions because artificial tethering of the two organelles rescues autophagy changes induced by loss of the VAPB-PTPIP51 tethers. Finally, we demonstrate that the mechanism by which the VAPB-PTPIP51 tethers regulate autophagy involves their key role in mediating delivery of  $\text{Ca}^{2+}$  to mitochondria from ER stores. Our findings reveal a new molecular mechanism for regulating autophagy.

## RESULTS

### siRNA Loss of VAPB and PTPIP51 Induces Autophagy

To gain insight into the role of ER-mitochondria associations in autophagy, we first downregulated VAPB or PTPIP51 expression using siRNAs and monitored basal levels of autophagy in HeLa and HEK293 cells. HeLa and HEK293 cells have been used in many studies of autophagy, e.g. [14, 15]. Such siRNA loss of VAPB and PTPIP51 has been shown to markedly reduce ER-mitochondria contacts in a variety of cell types [9, 10]. We used previously characterized siRNAs, and in agreement with earlier studies, these siRNAs led to an approximate 90% reduction in VAPB and PTPIP51 expression in both cell lines (Figures 1A and 1B). To monitor autophagy, we quantified the number of au-

tophagic structures that were present in cells using markers that are recruited to the phagophore and form the autophagosome at different stages. These markers were ULK1, which is one of the earliest proteins recruited to the phagophore; double FYVE-containing protein 1 (DFCP1), which is another early marker of the phagophore; ATG5, which forms a complex with ATG12 to mediate autophagosome elongation; and finally LC3, which is the most commonly used marker for monitoring autophagy and which is present from the later stages of autophagosome formation to the autolysosome [14]. Endogenous ULK1 and ATG5 were detected by immunostaining, whereas DFCP1 and LC3 were detected by transfection of EGFP-tagged proteins. Loss of VAPB or PTPIP51 induced a marked increase in the number of structures labeled by all of these autophagy markers (Figure 1C).

To complement these light microscopy studies, we also monitored how siRNA loss of VAPB or PTPIP51 affected autophagosome numbers as detected by EM. EM has been used in many studies of autophagy [14, 16]. In the EM, autophagic vacuoles are discernible as double-membrane vacuoles containing engulfed cytosolic contents or heterogeneous electron-dense structures with undigested material; these features permit detection and quantification of autophagic vacuoles [14, 16]. EM confirmed that loss of VAPB or PTPIP51 increased the number of autophagic vacuoles (Figure 1D).

The increases in autophagic structures seen following loss of VAPB and PTPIP51 in the above assays could be due to an induction of autophagy or, alternatively, be the consequence of reduced autophagosome turnover. To address this issue, we monitored LC3-II formation by immunoblotting in VAPB and PTPIP51 siRNA knockdown HeLa cells that were also treated with saturating levels of bafilomycin A1. Bafilomycin A1 is an inhibitor of the vacuolar  $\text{H}^{+}$ -ATPase and so inhibits lysosomal acidification and the fusion between autophagosomes and lysosomes so as to block LC3-II degradation; as such, bafilomycin A1 treatment can aid in monitoring autophagosome synthesis [17]. As was the case with HEK293 cells (Figure 1B), siRNA loss of VAPB and PTPIP51 increased the amounts of LC3-II in HeLa cells (Figure 2A). Moreover, LC3-II levels in the presence of bafilomycin A1 increased in control siRNA cells, but this increase was augmented in VAPB and PTPIP51 siRNA knockdown cells, suggesting that loss of VAPB and PTPIP51 stimulates autophagic flux (Figure 2A). To test this further, we monitored aggregation of a widely used model autophagy substrate, EGFP-tagged huntingtin exon 1 containing 74 polyglutamine repeats (EGFP-HDQ74) [18]. In agreement with previous studies, transfected EGFP-HDQ74 formed clearly discernible aggregates in some untreated or control-siRNA-treated cells [18]. However, the numbers of these aggregates were significantly decreased in VAPB and PTPIP51 siRNA knockdown cells (Figure 2B). Loss of VAPB and PTPIP51 therefore appears to enhance

nuclei; scale bars are 10  $\mu\text{m}$ . Bar charts show quantification of autophagic structures (dots/cell). Data were analyzed by one-way ANOVA and Tukey's post hoc test. For ULK1, EGFP-DFCP1, and ATG5,  $n = 45$ –200 cells; for EGFP-LC3,  $n = 401$ –466 cells per condition in five independent experiments. Error bars are SEM; \* $p \leq 0.05$ ; \*\*\* $p \leq 0.001$ .

(D) siRNA knockdown of VAPB or PTPIP51 increases the number of autophagic structures detected in the EM. Representative EM images of UT HeLa cells or cells treated with CTRL, VAPB, or PTPIP51 siRNAs as indicated are shown. Both low- and high-power (zoom) images are displayed. Arrows indicate autophagic structures. The scale bar represents 500 nm. The bar chart shows number of autophagic structures/ $\mu\text{m}^2$ . Data were analyzed by one-way ANOVA and Tukey's post hoc test.  $n = 15$ –17 cells. Error bars are SEM; \*\*\* $p \leq 0.001$ .

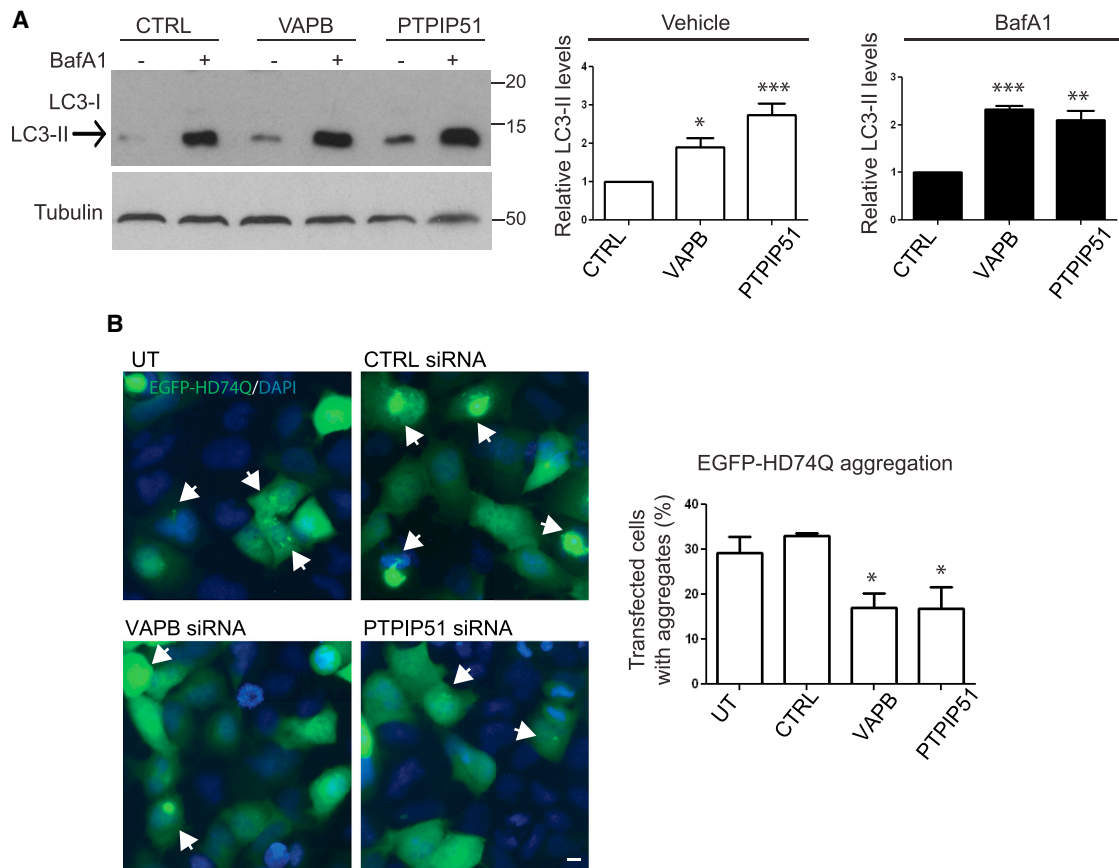

### Figure 2. siRNA Knockdown of VAPB or PTPIP51 Induces Autophagic Flux

(A) HeLa cells were treated with CTRL VAPB or PTPIP51 siRNAs and treated with either vehicle or bafilomycin A1 ( $\pm$ BafA1) as indicated and samples then probed on immunoblots for LC3 and  $\alpha$ -tubulin as a loading control. Both LC3-I and LC3-II isoforms are shown; arrow indicates LC3-II isoform. Bafilomycin A1 increases the levels of LC3-II in control, VAPB, and PTPIP51 siRNA knockdown cells. Bar chart shows relative LC3-II levels following quantification of signals from immunoblots. LC3-II levels were normalized to  $\alpha$ -tubulin signals. Protein molecular mass markers are indicated in kD. Data were analyzed by one-way ANOVA and Tukey's post hoc test;  $n = 5$  (vehicle) and  $n = 3$  (bafilomycin A1). Error bars are SEM; \* $p \leq 0.05$ ; \*\* $p \leq 0.01$ ; \*\*\* $p \leq 0.001$ .

(B) siRNA knockdown of VAPB or PTPIP51 decrease EGFP-HD74Q aggregation. Representative images of HEK293 cells transfected with EGFP-HDQ74 and either UT or treated with CTRL, VAPB, or PTPIP51 siRNAs are shown. Cells were analyzed 48 hr post EGFP-HDQ74 transfection. Arrows indicate cells containing EGFP-HDQ74 aggregates. Blue represents DAPI staining of nuclei. The scale bar represents 10  $\mu$ m. Bar chart shows percentage of EGFP-HD74Q transfected cells displaying aggregates. Data were obtained from 300–550 EGFP-HD74Q-transfected cells per condition in three independent experiments. Data were analyzed by one-way ANOVA and Tukey's post hoc test. Error bars are SEM; \* $p \leq 0.05$ .

clearance of EGFP-HDQ74 aggregates, which is consistent with the effects of VAPB or PTPIP51 loss in the LC3 turnover assays. Collectively, these findings demonstrate that loss of VAPB and PTPIP51 to reduce ER-mitochondria associations stimulates autophagic flux.

### Overexpression of VAPB and PTPIP51 Impairs Autophagy

We next enquired how increasing ER-mitochondria associations affected autophagy. To do so, we co-transfected cells with either control vector, VAPB, or PTPIP51 and EGFP-LC3 as a marker for autophagic structures. Such overexpression of VAPB or PTPIP51 has been shown to markedly increase ER-mitochondria contacts [9, 13]. Transfection of VAPB or PTPIP51 both decreased the number of EGFP-LC3 autophagic structures in the cells (Figure 3A). Moreover, whereas treatment of the cells with bafilomycin A1 to block LC3 degradation markedly increased the number of EGFP-LC3 structures in cells

transfected with control vector, this increase was significantly reduced in the VAPB or PTPIP51 co-transfected cells (Figures 3A and 3B).

To complement these findings, we enquired how overexpression of VAPB or PTPIP51 affected LC3-II levels by immunoblotting. LC3-II levels were reduced in VAPB- and PTPIP51-transfected cells, but whereas treatment with bafilomycin A1 increased the levels of LC3-II in control cells, the magnitude of this increase was reduced in VAPB- and PTPIP51-transfected cells (Figure 3C). These effects of bafilomycin A1 suggest that the overexpression of VAPB and PTPIP51 inhibits autophagosome production.

To test this possibility further, we monitored how overexpression of VAPB or PTPIP51 affected aggregation of EGFP-HDQ74. Cells were co-transfected with EGFP-HDQ74 and either control vector, VAPB, or PTPIP51 and the number of cells with EGFP-HDQ74 aggregates quantified. Co-transfection of VAPB or PTPIP51 both increased the proportion of cells containing

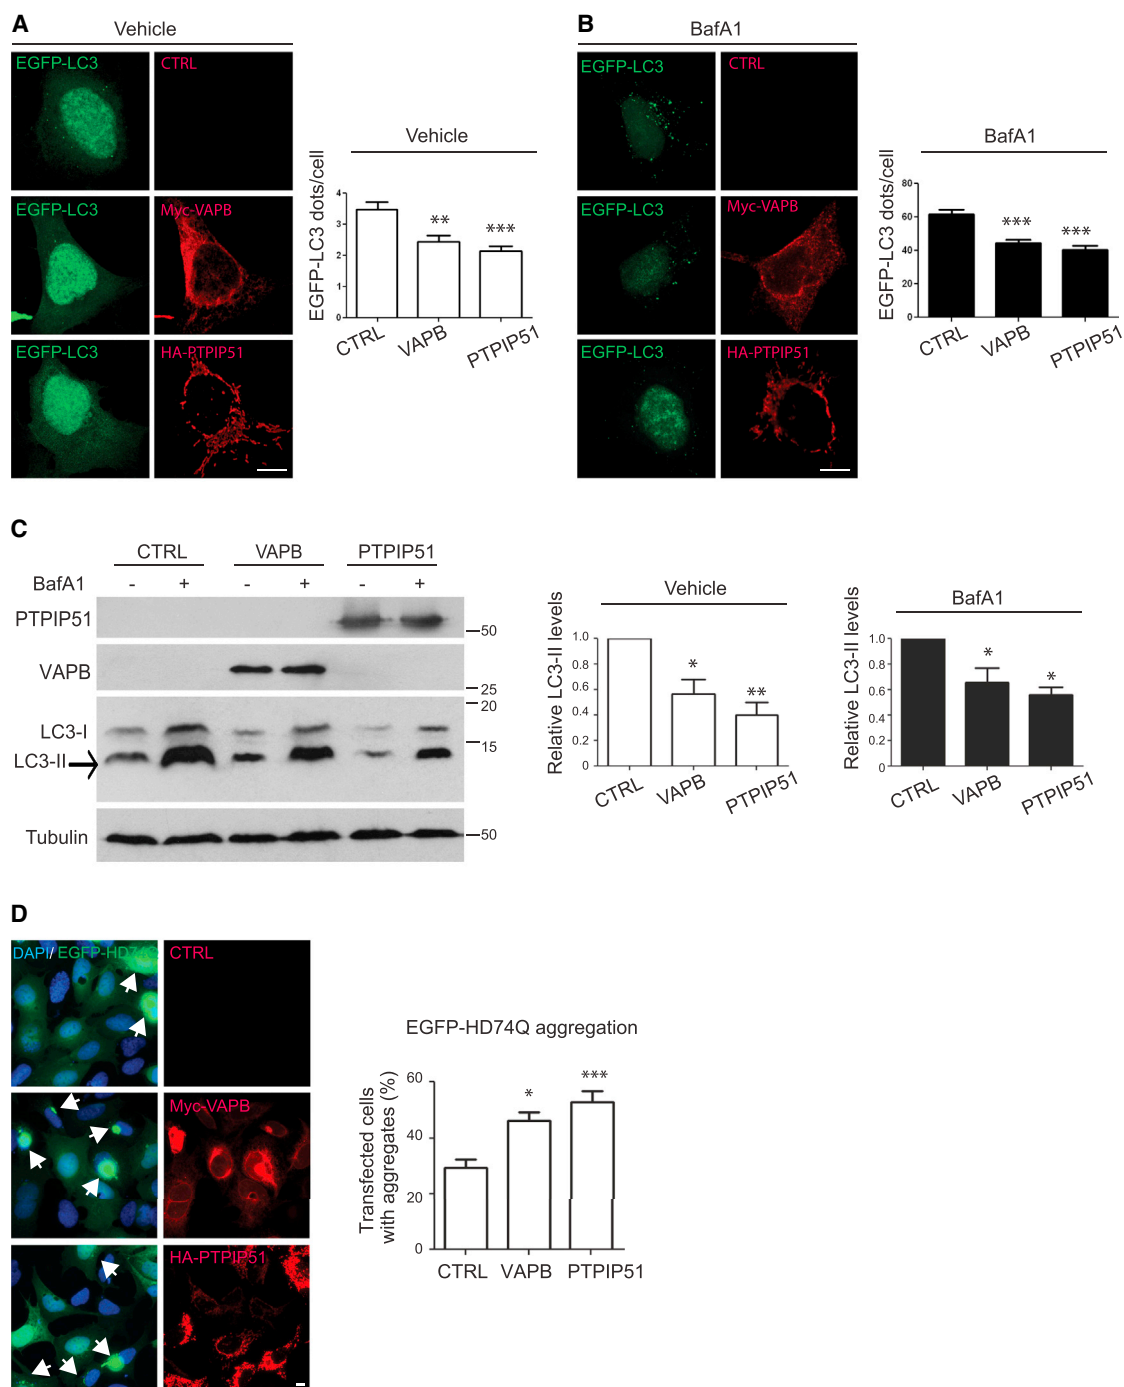

### Figure 3. VAPB or PTPIP51 Overexpression Inhibits Basal Autophagy and Autophagic Flux

(A and B) Representative images of HEK293 cells co-transfected with EGFP-LC3 and either control empty vector (CTRL), Myc-VAPB, or HA-PTPIP51 and treated with either vehicle (A) or bafilomycin A1 (BafA1) (B) as indicated. Cells were immunostained for VAPB and PTPIP51 via their epitope tags and LC3 visualized via the EGFP tag. Transfection of VAPB or PTPIP51 decreases the numbers of EGFP-LC3 structures in both vehicle- and bafilomycin A1-treated cells. The scale bars represent 10  $\mu$ m. The bar charts show numbers of EGFP-LC3 dots per cell in the different experiments. Data were analyzed by one-way ANOVA and Tukey's post hoc test.  $n = 100$ –130 cells per condition from three independent experiments. Error bars are SEM; \*\* $p \leq 0.01$ ; \*\*\* $p \leq 0.001$ .

(C) VAPB or PTPIP51 overexpression inhibits autophagic flux. HeLa cells were transfected with either control empty vector (CTRL), Myc-VAPB, or HA-PTPIP51 and treated with either vehicle (–) or bafilomycin A1 (BafA1+) as indicated. Samples were then probed on immunoblots for LC3 and  $\alpha$ -tubulin as a loading control. Protein molecular mass markers are indicated in kD. Both LC3-I and LC3-II isoforms are shown; arrow indicates LC3-II isoform. Also shown are immunoblots for PTPIP51 and VAPB, which were detected via their epitope tags. VAPB and PTPIP51 expression decreases the levels of LC3-II in both vehicle- and

(legend continued on next page)

EGFP-HDQ74 aggregates, which is again consistent with a decrease in autophagy (Figure 3D).

Expression of EGFP-HDQ74 is toxic to cells, and autophagic clearance of EGFP-HDQ74 is protective against this toxicity [18]. We therefore investigated how modulating expression of VAPB and PTPIP51 affected EGFP-HDQ74 toxicity by monitoring DAPI-stained nuclear morphology. Fragmented or pyknotic nuclei have been shown to be specific markers for cell death in EGFP-HDQ74-expressing cells, which shows a very high correlation with propidium iodide staining of live cells [18]. Compared to control vector, overexpression of VAPB or PTPIP51 both significantly increased the number of EGFP-HDQ74-transfected cells displaying abnormal nuclei (EGFP-HDQ74+control  $8.1 \pm 1.8$ , EGFP-HDQ74+VAPB  $17.3 \pm 2.0$  abnormal nuclei,  $p \leq 0.01$ , Student's *t* test; EGFP-HDQ74+control  $8.1 \pm 1.8$ , EGFP-HDQ74+PTPIP51  $21.2 \pm 6.4$  abnormal nuclei,  $p \leq 0.05$ , Student's *t* test;  $n = 468$ – $610$  cells). By contrast, siRNA loss of PTPIP51 reduced the numbers of EGFP-HDQ74 cells displaying abnormal nuclei (EGFP-HDQ74+control  $11.0 \pm 1.2$ ; EGFP-HDQ74+PTPIP51 siRNA  $4.7 \pm 0.6$  abnormal nuclei;  $p \leq 0.05$ ; Student's *t* test;  $n = 361$ – $440$  cells). siRNA loss of VAPB showed a trend toward reducing the number of EGFP-HDQ74 cells displaying abnormal nuclei, but this did not reach significance. However, caution must be taken in interpreting such results as being solely linked to EGFP-HDQ74 toxicity. Tightening and loosening of ER-mitochondria contacts for extended periods are both predicted to be detrimental to cells. Tightening can induce  $Ca^{2+}$  overload in mitochondria, which leads to opening of the mitochondrial permeability transition pore and signaling for apoptosis; loosening reduces the ability of mitochondria to generate ATP [6, 7]. Such effects may contribute to cellular toxicity via routes that are independent of EGFP-HDQ74 autophagic clearance.

### Overexpression of VAPB and PTPIP51 Impairs Rapamycin- and Torin-1-Induced, but Not Starvation-Induced, Autophagy

The above studies show that overexpression of VAPB or PTPIP51 to increase ER-mitochondria associations leads to a reduction in basal autophagy. To determine the effects of VAPB and PTPIP51 overexpression on chemically induced autophagy, we quantified the numbers of EGFP-LC3 and EGFP-DFCP1 autophagic structures in co-transfected cells with either control vector, VAPB, or PTPIP51 and treated with vehicle, rapamycin, or torin 1. Rapamycin and torin 1 are two structurally distinct compounds that induce autophagy by inhibiting the mammalian target of rapamycin (mTOR); mTOR negatively regulates autophagy [19]. As expected, rapamycin and torin 1 markedly increased the numbers of EGFP-LC3 structures in control-transfected cells (rapamycin: numbers of structures in vehicle-treated cells  $3.6 \pm 0.4$ , number of structures in rapamycin-

cin-treated cells  $5.7 \pm 1.2$ ,  $p \leq 0.05$ , Student's *t* test; torin A: number of structures in vehicle-treated cells  $3.9 \pm 0.6$ , number of structures in torin 1-treated cells  $12.7 \pm 3.1$ ,  $p \leq 0.01$ , Student's *t* test; 80–100 cells were analyzed per condition from three independent experiments). However, these effects of rapamycin and torin 1 were significantly reduced in cells co-transfected with either VAPB or PTPIP51 (Figures 4A and 4B). Likewise, rapamycin and torin 1 markedly increased the numbers of EGFP-DFCP1 structures in control-transfected cells (rapamycin: numbers of structures in vehicle-treated cells  $17.7 \pm 9.6$ , number of structures in rapamycin-treated cells  $26.9 \pm 15.7$ ,  $p \leq 0.05$ , Student's *t* test; torin A: number of structures in vehicle-treated cells  $17.7 \pm 9.6$ , number of structures in torin 1-treated cells  $60.4 \pm 29.3$ ,  $p \leq 0.01$ , Student's *t* test; 75–100 cells were analyzed per condition from three independent experiments). Again, these effects of rapamycin and torin 1 were significantly reduced in cells co-transfected with either VAPB or PTPIP51 (Figures 4D and 4E). Thus, consistent with the effects of VAPB and PTPIP51 on basal autophagy, overexpression of VAPB and PTPIP51 both led to a reduction in the number of EGFP-LC3 and EGFP-DFCP1 autophagic structures in cells undergoing chemically induced autophagy.

We also monitored how starvation-induced autophagy was affected by overexpression of VAPB or PTPIP51. To do so, we grew cells in media lacking all amino acids, as described by others [15, 20, 21]. As expected, starvation significantly increased the numbers of both EGFP-LC3 and EGFP-DFCP1 structures in transfected HEK293 cells (numbers of EGFP-LC3 in control cells  $3.6 \pm 2.5$ , number of EGFP-LC3 structures in starved cells  $9.2 \pm 6$ ,  $p \leq 0.05$ , Student's *t* test; numbers of EGFP-DFCP1 in control cells  $23 \pm 12.8$ , number of EGFP-DFCP1 structures in starved cells  $41.3 \pm 36.2$ ,  $p \leq 0.001$ , Student's *t* test; 74 to 75 cells were analyzed per condition from three independent experiments). However, unlike autophagy induced by rapamycin or torin 1, expression of VAPB or PTPIP51 had no effect on the number of EGFP-LC3 or EGFP-DFCP1 autophagic structures in cells undergoing starvation-induced autophagy (Figures 4C and 4F).

### The Effects of siRNA Loss of VAPB and PTPIP51 on Autophagy Are Rescued by Artificial Tethering of ER and Mitochondria

The above studies demonstrate that VAPB and PTPIP51 regulate autophagy. However, they do not eliminate the possibility that the effects of VAPB and PTPIP51 on autophagy are unrelated to their ER-mitochondria tethering function and are due to some other, as yet uncharacterized, function of these proteins. We therefore monitored autophagosome formation in VAPB or PTPIP51 siRNA knockdown cells, in which breaking of ER-mitochondria contacts was rescued by use of an artificial tether. This tether comprises the outer-mitochondrial-membrane-targeting

bafilomycin-A1-treated cells. The bar chart shows relative LC3-II levels following quantification of signals from immunoblots. LC3-II levels were normalized to  $\alpha$ -tubulin signals. Data were analyzed by one-way ANOVA and Tukey's post hoc test;  $n = 3$ . Error bars are SEM; \* $p \leq 0.05$ ; \*\* $p \leq 0.01$ .

(D) VAPB and PTPIP51 expression increases EGFP-HD74Q aggregation in HEK293T cells. Cells were co-transfected with EGFP-HD74Q and either control empty vector (CTRL), Myc-VAPB, or HA-PTPIP5 and immunostained for VAPB and PTPIP51 via their epitope tags. Cells were analyzed 48 hr post-transfection. Arrows indicate cells containing EGFP-HD74Q aggregates; blue represents DAPI staining of nuclei. The scale bar represents 10  $\mu$ m. The bar chart shows percentage of EGFP-HD74Q-transfected cells displaying aggregates. Data were obtained from 320–580 EGFP-HD74Q-transfected cells per condition from five independent experiments. Data were analyzed by one-way ANOVA and Tukey's post hoc test. Error bars are SEM; \* $p \leq 0.05$ ; \*\*\* $p \leq 0.001$ .

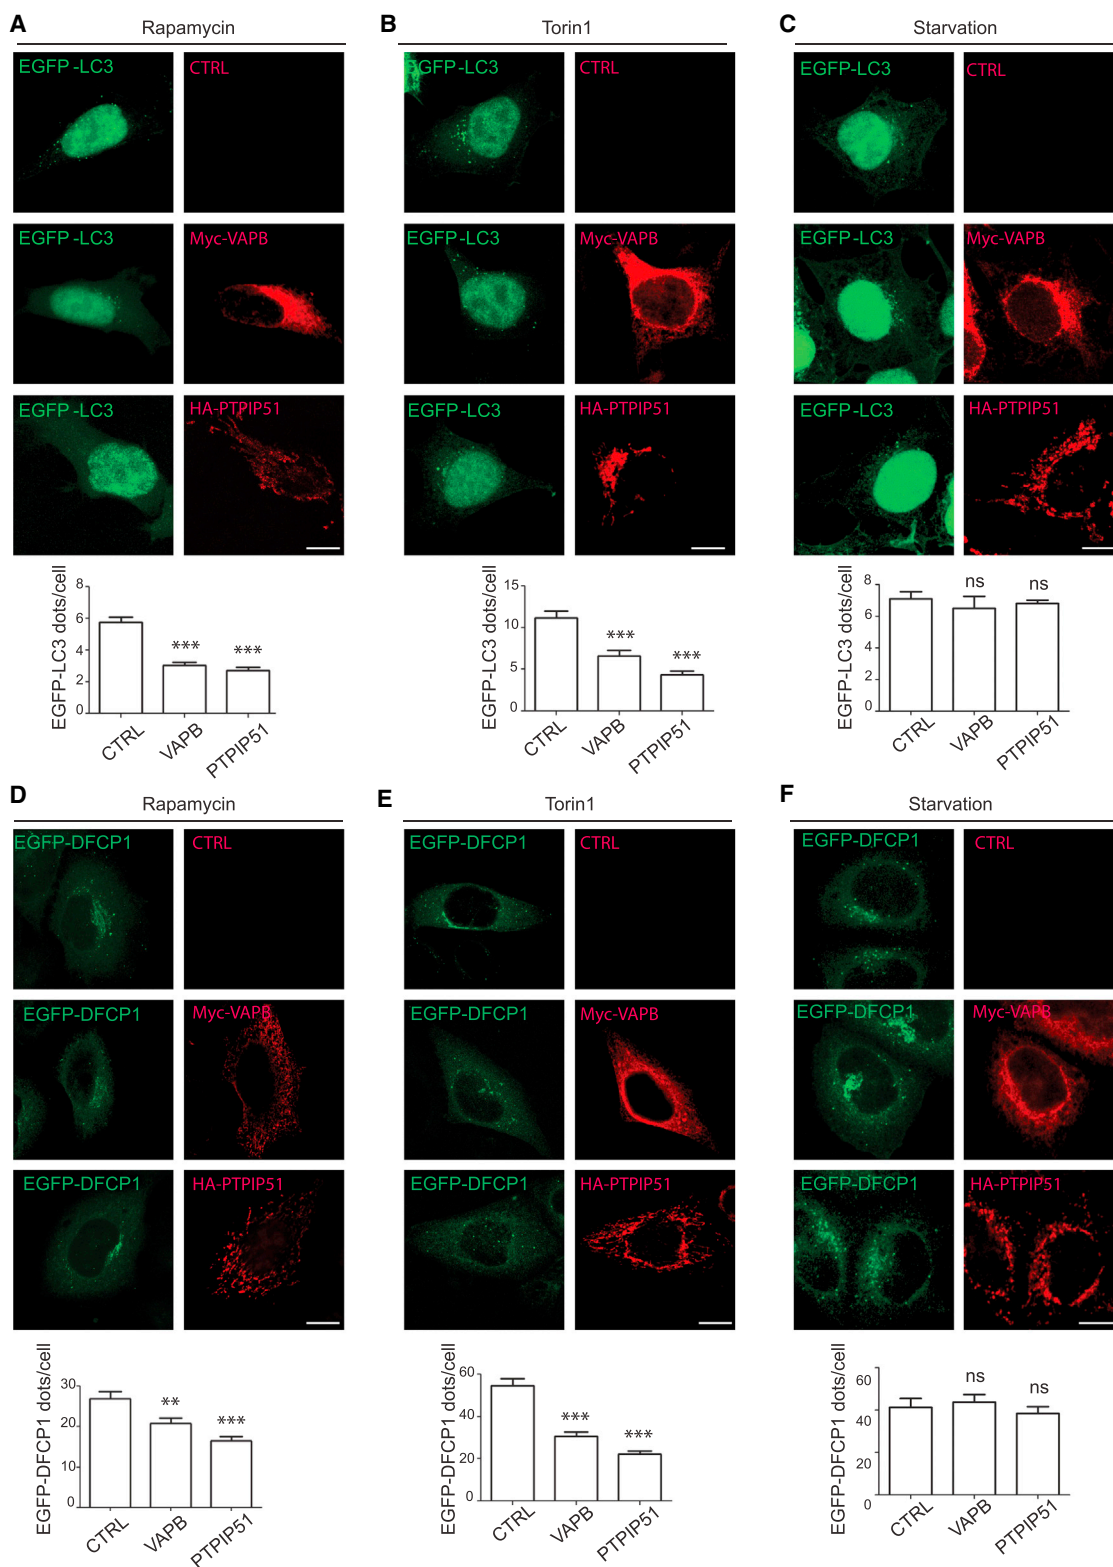

**Figure 4. VAPB and PTPIP51 Overexpression Inhibits Rapamycin- and Torin-1-Induced, but Not Starvation-Induced, Autophagy**

(A–C) Representative images of HEK293T cells co-transfected with EGFP-LC3 and either control empty vector (CTRL), Myc-VAPB, or HA-PTPIP51 as indicated and treated with rapamycin (A), torin 1 (B), or starvation (C). Cells were immunostained for VAPB and PTPIP51 via their epitope tags and LC3 visualized via the

(legend continued on next page)



sequence of mitochondrial A-kinase anchor protein-1 and the ER-targeting sequence of yeast ubiquitin-conjugating enzyme E2 6, fused to the N and C termini, respectively, of red fluorescent protein (Mito-RFP-ER). Expression of Mito-RFP-ER has been shown to artificially increase ER-mitochondria tethering via these targeting sequences, and RFP permits identification of transfected cells [8].

To first confirm that Mito-RFP-ER increases ER-mitochondria tethering in our hands, we monitored its effect on ER-mitochondria associations using proximity ligation assays. For these, we utilized antibodies to the inositol 1,4,5-trisphosphate (IP3) receptor3 and the voltage-dependent anion channel (VDAC1) because IP3 receptors located in MAM form a functional connection with the outer mitochondrial membrane protein VDAC1 to facilitate  $\text{Ca}^{2+}$  exchange between the two organelles [6, 7]. The distances detected by proximity ligation assays are similar to those detected by resonance energy transfer between fluorophores (i.e., approximately 10 nm) [22], and so these assays are suitable for detection of ER-mitochondria contacts. Indeed, proximity ligation assays, including ones for the IP3 receptor and VDAC1, have already been used to quantify ER-mitochondria associations [10, 12, 23].

To demonstrate the specificity of the proximity ligation assays, we first performed control experiments in which primary IP3 receptor3 and/or VDAC1 antibodies were omitted. Omission of primary antibodies produced none or only very few signals, whereas inclusion of both antibodies generated large numbers of signals (IP3 receptor3 antibody only:  $0.209 \pm 0.048$  signals/cell,  $n = 105$  cells; VDAC1 antibody only:  $0.085 \pm 0.029$  signals/cell,  $n = 94$  cells; IP3 receptor3+VDAC1 antibodies  $61.35 \pm 5.43$  signals/cell,  $n = 55$  cells; from three independent experiments). As expected, siRNA loss of VAPB or PTPIP51 decreased whereas expression of Mito-RFP-ER increased IP3 receptor3-VDAC1 proximity ligation assay signals in cells (Figure S1). Moreover, expression of Mito-RFP-ER partially rescued the effects of loss of VAPB or PTPIP51 on these signals (Figure S1).

We therefore monitored how expression of Mito-RFP-ER affected autophagosome formation in VAPB or PTPIP51 siRNA knockdown cells. To do so, we quantified the number of EGFP-LC3 and EGFP-DFCP1 structures in HeLa cells as described earlier (see Figure 1C). Compared to RFP control, expression of Mito-RFP-ER alone decreased the number of EGFP-LC3 and EGFP-DFCP1 structures, which demonstrates further that increasing ER-mitochondria contacts inhibits autophagosome formation (Figures 5A and 5B). However, whereas loss of VAPB or PTPIP51 increased the numbers of EGFP-LC3 and EGFP-DFCP1 structures (in agreement with earlier studies; Figure 1C), these increases were significantly reduced in cells co-transfected with Mito-RFP-ER (Figures 5A and 5B). Thus, the increases in autophagosome formation induced by loss of

VAPB or PTPIP51 expression are linked to the ER-mitochondria tethering function of VAPB and PTPIP51.

We also monitored how expression of the Mito-RFP-ER artificial tether affected chemically and starvation-induced autophagy. To do so, we monitored the numbers of EGFP-LC3 structures in torin 1 and starved HEK293 cells that were also transfected with Mito-RFP-ER. In agreement with studies on the effects of the VAPB-PTPIP51 tethers on chemically and starvation-induced autophagy (Figure 4), expression of Mito-RFP-ER reduced the numbers of EGFP-LC3 autophagic structures in torin 1, but not starved cells (Figure S2).

### The Effect of VAPB and PTPIP51 on Autophagy Involves Their Role in Mediating ER-Mitochondria $\text{Ca}^{2+}$ Exchange

A primary function of ER-mitochondria contacts is to facilitate delivery of  $\text{Ca}^{2+}$  to mitochondria from ER stores. A major route for this delivery involves release of  $\text{Ca}^{2+}$  from IP3 receptors located in MAM for uptake by mitochondria via VDAC and the mitochondrial  $\text{Ca}^{2+}$  uniporter [6, 7]. The tight contacts between ER and mitochondria at MAM facilitate this exchange because they enable high local concentrations of  $\text{Ca}^{2+}$  ( $\text{Ca}^{2+}$  puffs) to be achieved, which are sufficient to drive a response at the mitochondrial surface [6, 7].

A number of studies have now shown that reductions in IP3 receptor function and impaired  $\text{Ca}^{2+}$  uptake by mitochondria stimulate autophagy [24–29]. Thus, the effects of VAPB and PTPIP51 on autophagy may be linked to  $\text{Ca}^{2+}$  exchange via MAM at ER-mitochondria contact sites. To test this possibility further, we first monitored whether siRNA knockdown or overexpression of VAPB or PTPIP51 to decrease or increase ER-mitochondria contacts, respectively, affected expression of key ER-mitochondria  $\text{Ca}^{2+}$  exchange proteins. To do so, we probed immunoblots of VAPB/PTPIP51-transfected/siRNA-treated HEK293 cells for IP3 receptor, VDAC, or the mitochondrial  $\text{Ca}^{2+}$  uniporter. However, we detected no changes in expression of any of these proteins in the VAPB or PTPIP51 siRNA knockdown or transfected cells (Figures S3A and S3B). We next monitored whether overexpression of VAPB or PTPIP51 affected IP3 receptor3-VDAC1 interactions using proximity ligation assays. As predicted, expression of VAPB or PTPIP51 both led to increases in IP3 receptor3-VDAC1 interactions (Figure 6A). These results complement the effects of siRNA knockdown of VAPB or PTPIP51, which induce reductions in IP3 receptor3-VDAC1 interactions (Figure S1). Finally, we monitored how overexpression of VAPB or PTPIP51 affected uptake of  $\text{Ca}^{2+}$  by mitochondria following IP3 receptor-mediated release from ER stores. For these experiments, we used HEK293 cells co-transfected with the M3 muscarinic-acetylcholine-receptor (M3R) and triggered physiological IP3 receptor-mediated  $\text{Ca}^{2+}$  release by application of the M3R agonist oxotremorine-M. In line with previous studies on ER-mitochondria associations, we used HEK293 cells for

EGFP tag. The bar charts show number of EGFP-LC3 dots per cell in the different experiments. Data were analyzed by one-way ANOVA and Tukey's post hoc test.  $n = 80$ – $192$  cells per condition from three independent experiments. Error bars are SEM; \*\*\* $p \leq 0.001$ ; ns, not significant.

(D–F) Representative images of HeLa cells co-transfected with EGFP-DFCP1 and either control empty vector (CTRL), Myc-VAPB, or HA-PTPIP51 and treated with rapamycin (D), torin 1 (E), or starvation (F). Cells were immunostained for VAPB and PTPIP51 via their epitope tags and DFPC1 visualized via the EGFP tag. The bar charts show number of EGFP-DFCP1 dots per cell in the different experiments. Data were analyzed by one-way ANOVA and Tukey's post hoc test.  $n = 75$ – $100$  cells per condition from three independent experiments. Error bars are SEM; \*\* $p \leq 0.01$ ; \*\*\* $p \leq 0.001$ .

Scale bars represent 10  $\mu\text{m}$ . See also Figure S2.

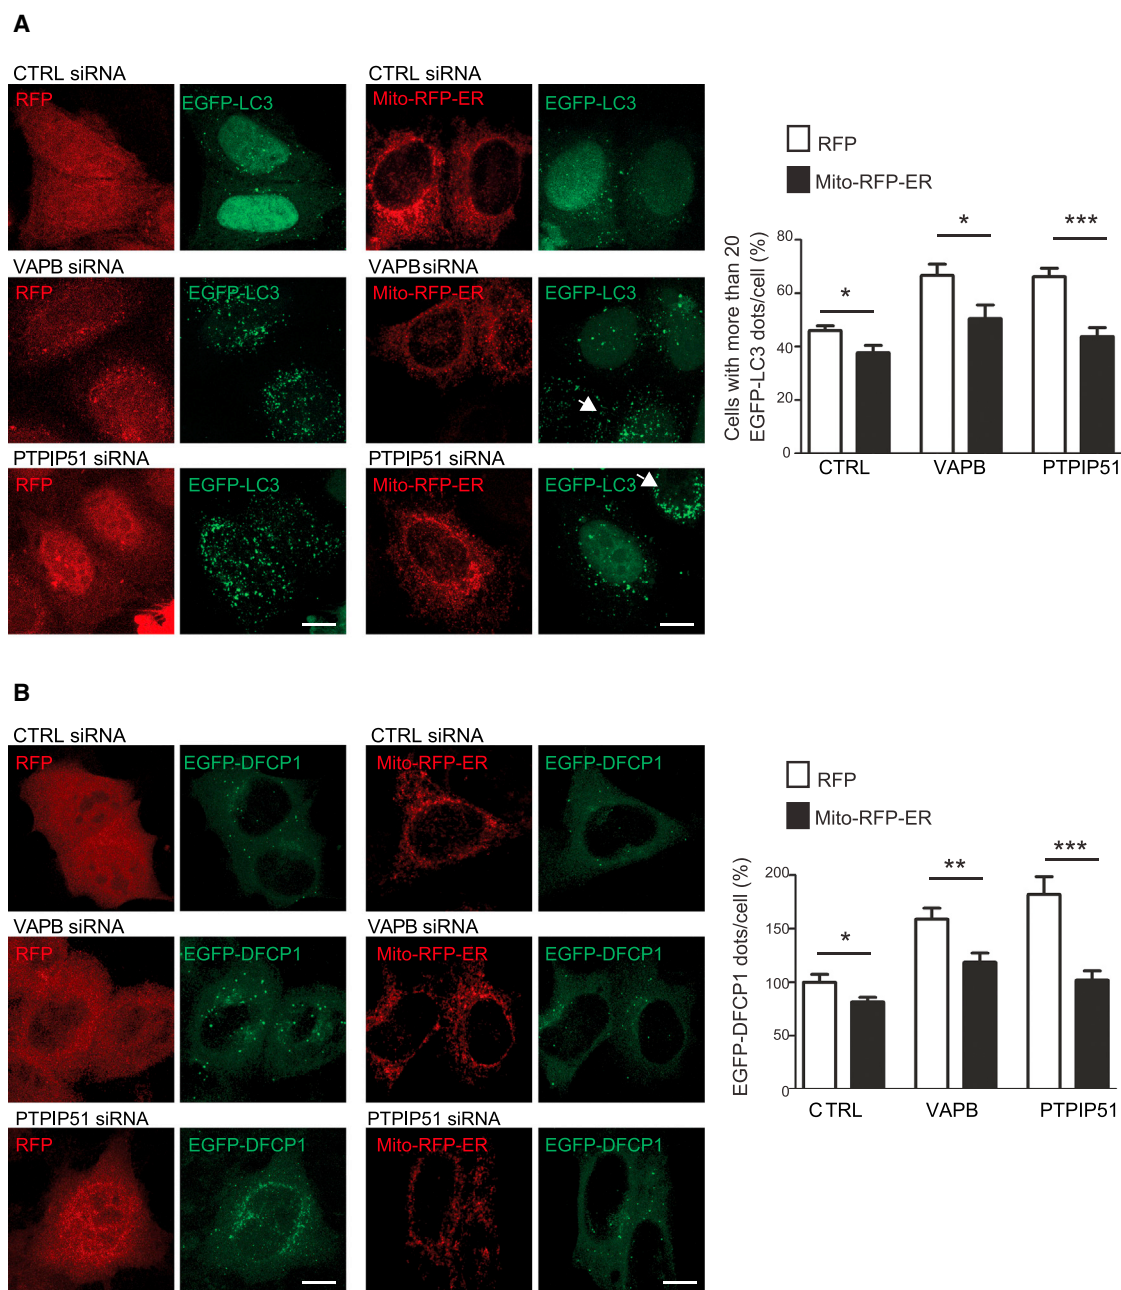

**Figure 5. Artificially Tethering ER and Mitochondria by Transfection of Mito-RFP-ER Reduces the Effect of siRNA Loss of VAPB or PTPIP51 on Autophagosome Formation**

(A) Representative images of HEK293 cells treated with either control, VAPB, or PTPIP51 siRNAs and then transfected with EGFP-LC3+control RFP or EGFP-LC3+Mito-RFP-ER as indicated; arrows show non-transfected cells for comparison. The scale bars represent 10  $\mu$ m.

(B) Representative images of HeLa cells treated with either control, VAPB, or PTPIP51 siRNAs and then transfected with EGFP-DFCP1+RFP or EGFP-DFCP1+Mito-RFP-ER as indicated. The scale bars represent 10  $\mu$ m.

The bar charts show quantification of EGFP-LC3 (A) and EGFP-DFCP1 (B) autophagic structures (dots/cell). Data were analyzed by Student's t test.  $n = 71$ – $264$  cells per condition in three to five independent experiments. Error bars are SEM; \* $p \leq 0.05$ ; \*\* $p \leq 0.01$ ; \*\*\* $p \leq 0.001$ . See also Figure S1.

these experiments because they do not express endogenous M3R and so provide a useful model for monitoring mitochondrial  $Ca^{2+}$  levels following its release from ER specifically in transfected cells [9, 10, 12]. Transfection of VAPB or PTPIP51 both induced significant increases in mitochondrial and correspond-

ing decreases in cytosolic  $Ca^{2+}$  levels in these experiments (Figure 6B). Again, these results complement previous studies that show that siRNA knockdown of VAPB or PTPIP51 reduce mitochondrial and increase cytosolic  $Ca^{2+}$  levels following IP<sub>3</sub>-receptor-mediated  $Ca^{2+}$  release [10]. Thus, overexpression and

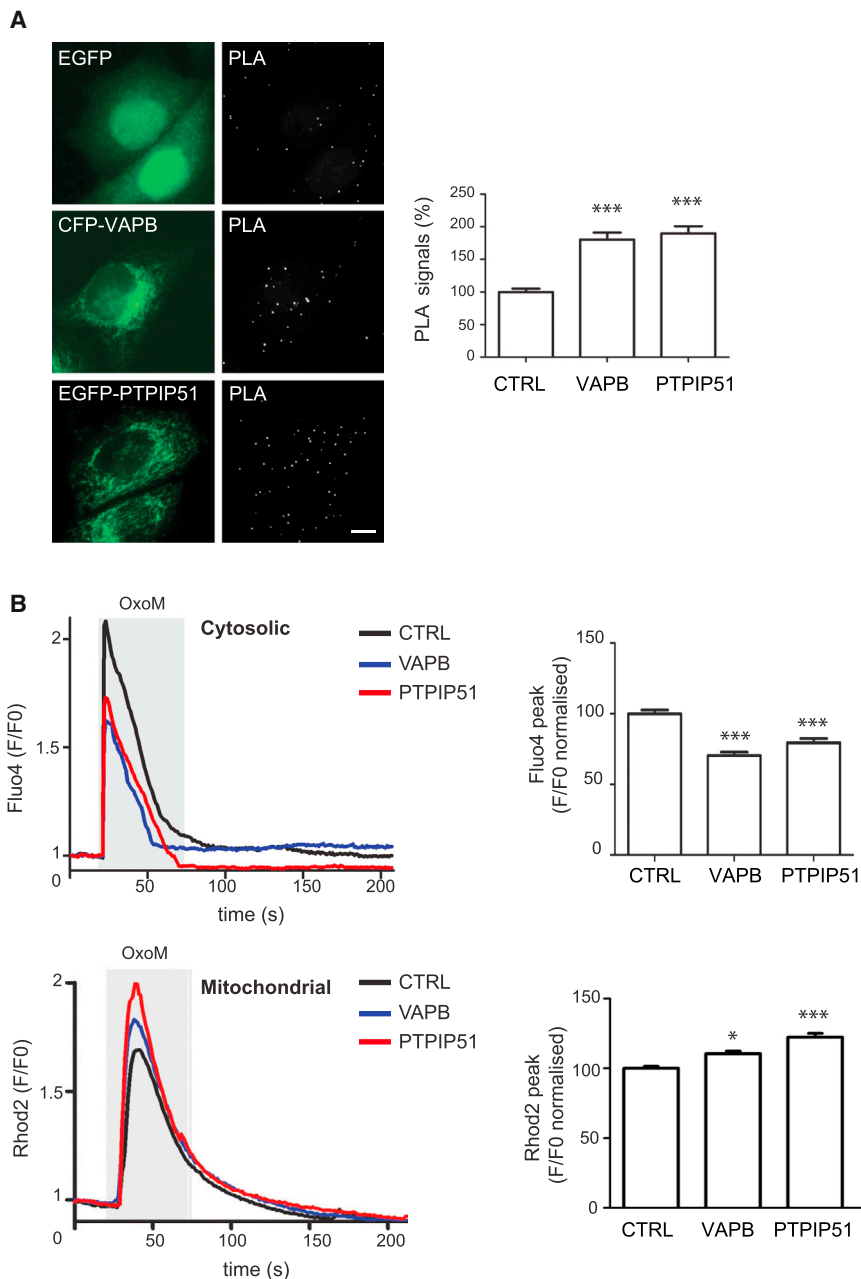

**Figure 6. Overexpression of VAPB or PTPIP51 Increases IP3 Receptor3-VDAC1 Interactions and ER-Mitochondria Ca<sup>2+</sup> Exchange**

(A) HeLa cells were transfected with control EGFP vector, CFP-VAPB, or EGFP-PTPIP51 and proximity ligation assays (PLAs) for IP3 receptor3-VDAC1 interactions then performed. Representative images with PLA signals in the different transfected cells are shown. The scale bar represents 10  $\mu\text{m}$ . The bar chart shows quantification of PLA signals. Data were analyzed by one-way ANOVA and Tukey's post hoc test.  $n = 77\text{--}142$  cells per condition from three independent experiments. Error bars are SEM; \*\*\* $p \leq 0.001$ .

(B) Cytosolic (upper) and mitochondrial (lower) Ca<sup>2+</sup> levels following oxotremorine-M (OxoM)-induced Ca<sup>2+</sup> release from ER stores. HEK293 cells were co-transfected with M3R and either control empty vector (CTRL), Myc-VAPB, or HA-PTPIP51 and treated with oxotremorine-M. Representative traces of Fluo4 (cytosolic) and Rhod2 (mitochondrial) fluorescence are shown on the left, and normalized peak values are shown on the right. Fluo4 and Rhod2 fluorescence shows transient increases in cytosolic and mitochondrial Ca<sup>2+</sup> levels upon OxoM-induced Ca<sup>2+</sup> release from ER stores. Compared to control, VAPB and PTPIP51 expression decreased peak cytosolic and increased peak mitochondrial Ca<sup>2+</sup> levels. Data were analyzed by one-way ANOVA and Tukey's post hoc test.  $n = 48\text{--}81$  cells from three independent experiments. Error bars are SEM; \* $p \leq 0.05$ ; \*\*\* $p \leq 0.001$ . See also Figure S3.

siRNA knockdown of VAPB and PTPIP51 to modulate ER-mitochondria contacts induce appropriate changes in IP3 receptor3-VDAC1 interactions and IP3-receptor-mediated mitochondrial Ca<sup>2+</sup> uptake. Moreover, these changes do not involve alterations to the levels of expression of IP3 receptor, VDAC, or the mitochondrial Ca<sup>2+</sup> uniporter.

We therefore inquired whether the reductions in autophagosome formation induced by overexpression of VAPB or PTPIP51 (Figure 3) involve stimulation of Ca<sup>2+</sup> delivery to mitochondria from IP3 receptors. To do so, we quantified the numbers of EGFP-LC3 autophagic structures in cells co-transfected with control vector, VAPB, or PTPIP51 and then treated with either vehicle, Xestospongin C, or Ruthenium-360 to block ER-mitochondria Ca<sup>2+</sup> exchange.

Treatment with Xestospongin C, Ruthenium-360, or mitochondrial Ca<sup>2+</sup> uniporter siRNAs all induced a significant increase in EGFP-LC3 autophagic structures (Figure S4B). These results are in line with previous studies that also show that inhibiting IP3-receptor-mediated delivery of Ca<sup>2+</sup> to mitochondria stimulates autophagosome formation [24, 26–28, 31–33]. However, the inhibitory effects of VAPB and PTPIP51 overexpression on EGFP-LC3 autophagosome formation (Figure 3) were abrogated in cells treated with Xestospongin C or Ruthenium-360 and in the mitochondrial Ca<sup>2+</sup> uniporter siRNA knockdown cells (Figure 7A). Moreover, treatment of the cells with bafilomycin A1 to block LC3 degradation not only confirmed that siRNA loss of the mitochondrial Ca<sup>2+</sup> uniporter increased LC3-II levels, demonstrating

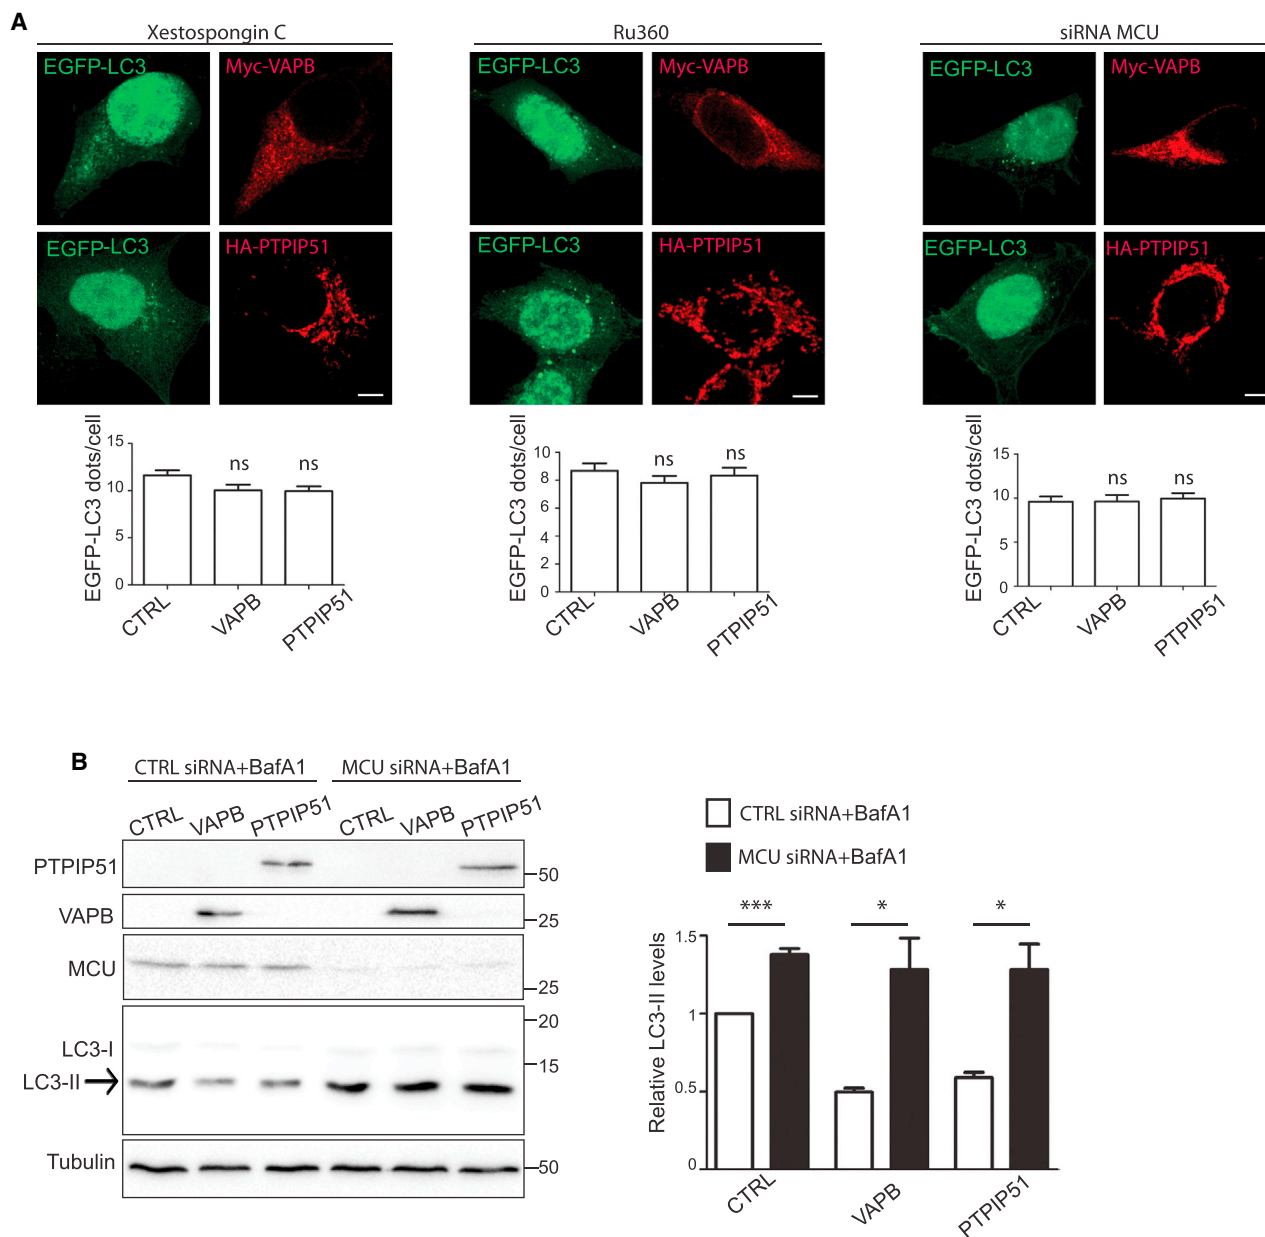

**Figure 7. Inhibiting IP3 Receptor-Mediated  $Ca^{2+}$  Delivery to Mitochondria Abrogates the Effects of VAPB and PTPIP51 Overexpression on Autophagosome Formation**

(A) Representative images of HEK293 cells co-transfected with EGFP-LC3 and either myc-VAPB or HA-PTPIP51 and treated with either the IP3 receptor inhibitor Xestospongin C, the mitochondrial  $Ca^{2+}$  uniporter (MCU) blocker Ruthenium-360 (Ru360), or MCU siRNAs. For MCU siRNAs, cells were first treated with siRNAs and then transfected with plasmids. Cells were immunostained for VAPB and PTPIP51 via their epitope tags and LC3 visualized via the EGFP tag. The scale bars represent 10  $\mu$ m. Bar charts show numbers of EGFP-LC3 dots per cell in the different experiments. Data were analyzed by one-way ANOVA.  $n = 118$ –187 cells in three or four independent experiments. Error bars are SEM.

(B) siRNA loss of MCU increases LC3-II levels and abrogates the effects of VAPB and PTPIP51 overexpression on LC3-II levels in bafilomycin-A1-treated HeLa cells. Cells were treated with CTRL or MCU siRNAs, transfected with either myc-VAPB or HA-PTPIP51, and treated with bafilomycin A1 (BafA1) as indicated. Samples were then probed on immunoblots for LC3, MCU, VAPB, PTPIP51, and  $\alpha$ -tubulin as a loading control. VAPB and PTPIP51 were detected via their epitope tags. Both LC3-I and LC3-II isoforms are shown; arrow indicates LC3-II isoform. Molecular mass markers are indicated in kD. The bar chart shows relative LC3-II levels following quantification of signals from immunoblots. LC3-II levels were normalized to  $\alpha$ -tubulin signals. Data were analyzed by one-way ANOVA and Tukey's post hoc test;  $n = 3$ . Error bars are SEM; \* $p \leq 0.05$ ; \*\*\* $p \leq 0.001$ .

See also Figure S4.

an induction of autophagy, but also revealed that this increase was unaffected by overexpression of VAPB or PTPIP51 (Figure 7B). Thus, the inhibitory effects of VAPB and PTPIP51 overexpression on autophagy induction are completely abrogated by blocking IP3-receptor-mediated delivery of  $\text{Ca}^{2+}$  to mitochondria.

## DISCUSSION

Tight contacts between regions of ER and mitochondria regulate a number of fundamental physiological processes [6, 7]. One mechanism by which these contacts form involves the tethering proteins VAPB and PTPIP51 [9, 10, 13]. Here, we demonstrate that the VAPB-PTPIP51 tethers also regulate autophagosome formation. We show that loosening ER-mitochondria contacts via loss of VAPB or PTPIP51 induces whereas tightening contacts by overexpression of VAPB or PTPIP51 impairs basal autophagy. We also show that chemical induction of autophagy by treatment with rapamycin or torin 1 is impaired in VAPB- or PTPIP51-overexpressing cells. Moreover, we show that expression of a synthetic linker protein that artificially tethers ER and mitochondria also reduces autophagosome formation and that this artificial tether rescues the effects of siRNA loss of VAPB or PTPIP51 on autophagy. Thus, these effects of VAPB and PTPIP51 manipulation on autophagy are associated with their ER-mitochondria tethering function and not some as yet unknown alternative function of these proteins.

Recently, others have also reported a role for ER-mitochondria associations in autophagy and mitophagy [15, 20, 21, 34, 35]. Our findings provide novel mechanistic data to demonstrate that ER-mitochondria contacts mediated by the VAPB-PTPIP51 tethers regulate autophagy. There are, however, some differences between these various studies. Notably, we find that loosening of ER-mitochondria contacts induces autophagosome formation, whereas some others report that such loosening is inhibitory to their formation [15, 20, 21]. The reasons for these dissimilar results may involve the different experimental approaches utilized. For example, in our study, we monitored basal and rapamycin-, torin 1-, and starvation-induced autophagy, whereas others have focused solely on autophagy induced by starvation [15, 20, 21]. Indeed, we found differences in how autophagy induced by rapamycin/torin 1 and starvation were affected by ER-mitochondria tethering.

Additionally, different studies have used different methods to experimentally manipulate ER-mitochondria contacts. In our study, this involved the VAPB-PTPIP51 tethers, but other investigations manipulated mitofusin-2 and phosphofurin acidic cluster sorting protein-2 (PACS-2) [15, 20, 21]. Both mitofusin-2 and PACS-2 have also been linked to ER-mitochondria tethering [36–38]. One possibility is that different tethering proteins mediate recruitment of distinct ER domains to mitochondria (rough or smooth ER, tubules, or sheets), and these may function to regulate autophagosome formation in different ways, with the precise outcome varying according to the autophagic stimulus and the nature of the structure targeted for autophagic clearance.

Setting aside these possibilities, the roles of mitofusin-2 and PACS-2 as ER-mitochondria tethering proteins are unclear.

Thus, whereas some reports show that loss of mitofusin-2 reduces ER-mitochondria contacts [36, 38], other studies contradict these findings and claim that such loss increases ER-mitochondria contacts [39–43]. Clearly, if mitofusin-2 loss increases rather than decreases ER-mitochondria tethering, then prior experiments involving loss of mitofusin-2 can be reinterpreted as showing that increased ER-mitochondria associations reduce autophagy.

Likewise, the precise role of PACS-2 in regulating ER-mitochondria associations is not properly established. PACS-2 is a multifunctional sorting protein involved in inter-organelle trafficking in the secretory and endosomal pathways [44]. In addition, it also translocates to the nucleus to regulate SIRT1-mediated deacetylation of p53 [45]. How these diverse functions link to ER-mitochondria associations are unclear, and certainly, there is no direct evidence to suggest that PACS-2 acts as an ER-mitochondria tethering protein, such as VAPB or PTPIP51. Rather, PACS-2 may function to somehow indirectly influence or regulate ER-mitochondria associations. Additionally, PACS-2 impacts upon mitochondrial morphology with loss of PACS-2 inducing extensive mitochondrial fragmentation [37]. The diversity of cell functions regulated by PACS-2 and these caveats involving mitochondrial morphology query the validity of concluding that changes in autophagosome formation induced by loss of PACS-2 are due solely to disruption of ER-mitochondria contacts.

Here, we investigated how altering ER-mitochondria associations via manipulating VAPB and PTPIP51 affects autophagy. As detailed above (see Introduction), a number of lines of evidence demonstrate that VAPB and PTPIP51 function as ER-mitochondria tethers [9–13]. We also utilized an artificial tether to manipulate ER-mitochondria associations, and this produced complementary results to those involving VAPB and PTPIP51. Thus, our approach provides a more direct and easily interpretable route for probing the role of ER-mitochondria contacts in autophagosome formation.

Our findings are also in line with a large number of studies that show that disruption of  $\text{Ca}^{2+}$  transfer from MAM-located IP3 receptors to mitochondria stimulates autophagy [24–29, 31, 32]. This, stimulation is proposed to represent a physiological response of the cell to altered bioenergetics because mitochondria require  $\text{Ca}^{2+}$  for efficient production of ATP (several dehydrogenases in the tricarboxylic acid cycle are  $\text{Ca}^{2+}$  regulated) [6, 7, 46]. A primary function of ER-mitochondria contacts is to facilitate IP3-receptor-mediated delivery of  $\text{Ca}^{2+}$  to mitochondria [6–8]. Consistent with these roles, loss of VAPB or PTPIP51 reduces whereas overexpression of VAPB or PTPIP51 increases mitochondrial  $\text{Ca}^{2+}$  uptake following its release from IP3 receptors (Figure 6B) [9, 10]. Together, these findings suggest that the effects of VAPB and PTPIP51 on autophagy are linked to their role in mediating  $\text{Ca}^{2+}$  exchange between ER and mitochondria at contact sites. In support of this, we found that the effects of VAPB and PTPIP51 overexpression on autophagosome formation were completely abrogated in cells treated with Xestospongin C, Ruthenium-360, or siRNAs for the mitochondrial  $\text{Ca}^{2+}$  uniporter, which all inhibit IP3-receptor-mediated delivery of  $\text{Ca}^{2+}$  to mitochondria. Thus, the mechanism by which the

VAPB-PTPIP51 tethering proteins impact upon autophagy involves their regulation of ER-mitochondria  $\text{Ca}^{2+}$  exchange at MAM.

Of interest was our finding that increased ER-mitochondria tethering induced by overexpression of VAPB, PTPIP51, or the Mito-RFP-ER artificial tethers inhibited rapamycin- and torin 1-induced, but not starvation-induced, autophagy. Rapamycin and torin 1 induce autophagy by selectively inhibiting mTOR [19]. By contrast, starvation-induced autophagy is more complex, involving mTOR and a variety of upstream nutrient-sensing molecules, including AMP-activated protein kinase and  $\text{Ca}^{2+}$ -calmodulin-dependent protein kinase  $\beta$  [46]. Starvation-induced, but not rapamycin-induced, autophagy is therefore dependent upon disruption of the BCL2-Beclin 1 interaction [47]. Also, whereas numerous studies have shown that blocking IP3-receptor-mediated delivery of  $\text{Ca}^{2+}$  to mitochondria stimulates autophagy [24–29, 31, 32] (and results shown here), paradoxically, starvation-induced autophagy requires release of  $\text{Ca}^{2+}$  from sensitized IP3 receptors [48]. Thus, the different effects of overexpression of VAPB, PTPIP51, and the artificial tethers on starvation- and rapamycin/torin 1-induced autophagy are probably due to differences in the signaling mechanism by which these stimuli induce autophagy. Whatever the precise scenario, the results described here demonstrate that the VAPB-PTPIP51 tethers regulate basal and rapamycin- and torin 1-induced autophagy and that this involves their role in facilitating IP3-receptor-mediated delivery of  $\text{Ca}^{2+}$  from ER stores to mitochondria.

Increasing evidence supports a role for autophagy in neurodegenerative diseases, and damage to ER-mitochondria signaling is a feature of these diseases [2, 6, 49, 50]. It will therefore be interesting to determine whether there are links between neurodegenerative disease insults, the VAPB-PTPIP51 tethers, and autophagy. The results described here form the basis for such studies.

## EXPERIMENTAL PROCEDURES

### Reagents

Details of plasmids, siRNAs, antibodies, and other reagents are described in [Supplemental Experimental Procedures](#).

### Cell Culture, Transfection, SDS-PAGE, and Immunoblotting

Cells were transfected with plasmids, treated with siRNAs, and analyzed by SDS-PAGE and immunoblotting essentially as described [9, 10, 12]. Full details are provided in [Supplemental Experimental Procedures](#).

### Microscopy

Cells were fixed and analyzed by immunofluorescence microscopy and EM essentially as previously described [9, 12]. Proximity ligation assays were performed using a Duolink In Situ Far Red kit according to the manufacturer's instructions (Sigma).  $\text{Ca}^{2+}$  measurements were obtained as described previously [9, 10, 12]. Confocal and wide-field images were acquired using Leica TCS-SP5 and Leica DM5000B microscopes, EM images acquired using a Tecnai 20 instrument, and  $\text{Ca}^{2+}$  measurements obtained with Zeiss Axiovert S100 or Nikon Eclipse TiE microscopes. Full details of microscopy methods and statistical and other analyses are provided in [Supplemental Experimental Procedures](#).

### Statistical Analyses

Statistics were performed using GraphPad Prism.

## SUPPLEMENTAL INFORMATION

Supplemental Information includes four figures and Supplemental Experimental Procedures and can be found with this article online at <http://dx.doi.org/10.1016/j.cub.2016.12.038>.

## AUTHOR CONTRIBUTIONS

P.G.-S. and C.C.J.M. designed the study. P.G.-S. performed most experiments, analyzed data, and wrote the manuscript. S.P. and R.S. performed  $\text{Ca}^{2+}$  and other experiments. C.C.J.M., W.N., and D.P.H. designed and supervised experiments and wrote the manuscript. All authors edited the manuscript.

## ACKNOWLEDGMENTS

We thank Gema Vizcay-Barrena, Naunehal Matharu, and Maria Jimenez-Sanchez (King's College) for help with EM, EGFP-LC3 stable cells, and EGFP-HD74Q aggregation assays; Noboru Mizushima, Gyorgy Hajnoczky, and David Rubinsztein for gifts of plasmids; and Ralph Nixon for advice. This work was supported by Parkinson's UK G-1308, ARUK PG2014-5 and EG2013B-1, MRC G0501573, and Wellcome Trust 078662.

Received: September 2, 2016

Revised: November 24, 2016

Accepted: December 16, 2016

Published: January 26, 2017

## REFERENCES

- Mizushima, N. (2007). Autophagy: process and function. *Genes Dev.* *21*, 2861–2873.
- Rubinsztein, D.C., Codogno, P., and Levine, B. (2012). Autophagy modulation as a potential therapeutic target for diverse diseases. *Nat. Rev. Drug Discov.* *11*, 709–730.
- Lamb, C.A., Yoshimori, T., and Tooze, S.A. (2013). The autophagosome: origins unknown, biogenesis complex. *Nat. Rev. Mol. Cell Biol.* *14*, 759–774.
- Westrate, L.M., Lee, J.E., Prinz, W.A., and Voeltz, G.K. (2015). Form follows function: the importance of endoplasmic reticulum shape. *Annu. Rev. Biochem.* *84*, 791–811.
- Phillips, M.J., and Voeltz, G.K. (2016). Structure and function of ER membrane contact sites with other organelles. *Nat. Rev. Mol. Cell Biol.* *17*, 69–82.
- Paillasson, S., Stoica, R., Gomez-Suaga, P., Lau, D.H., Mueller, S., Miller, T., and Miller, C.C. (2016). There's something wrong with my MAM; the ER-mitochondria axis and neurodegenerative diseases. *Trends Neurosci.* *39*, 146–157.
- Rowland, A.A., and Voeltz, G.K. (2012). Endoplasmic reticulum-mitochondria contacts: function of the junction. *Nat. Rev. Mol. Cell Biol.* *13*, 607–625.
- Csordás, G., Renken, C., Várnai, P., Walter, L., Weaver, D., Buttle, K.F., Balla, T., Mannella, C.A., and Hajnoczky, G. (2006). Structural and functional features and significance of the physical linkage between ER and mitochondria. *J. Cell Biol.* *174*, 915–921.
- Stoica, R., De Vos, K.J., Paillasson, S., Mueller, S., Sancho, R.M., Lau, K.F., Vizcay-Barrena, G., Lin, W.L., Xu, Y.F., Lewis, J., et al. (2014). ER-mitochondria associations are regulated by the VAPB-PTPIP51 interaction and are disrupted by ALS/FTD-associated TDP-43. *Nat. Commun.* *5*, 3996.
- De Vos, K.J., Mórotz, G.M., Stoica, R., Tudor, E.L., Lau, K.F., Ackerley, S., Warley, A., Shaw, C.E., and Miller, C.C.J. (2012). VAPB interacts with the mitochondrial protein PTPIP51 to regulate calcium homeostasis. *Hum. Mol. Genet.* *21*, 1299–1311.
- Huttlin, E.L., Ting, L., Bruckner, R.J., Gebreab, F., Gygi, M.P., Szpyt, J., Tam, S., Zarraga, G., Colby, G., Baltier, K., et al. (2015). The BioPlex

- network: a systematic exploration of the human interactome. *Cell* 162, 425–440.
12. Stoica, R., Paillusson, S., Gomez-Suaga, P., Mitchell, J.C., Lau, D.H., Gray, E.H., Sancho, R.M., Vizcay-Barrena, G., De Vos, K.J., Shaw, C.E., et al. (2016). ALS/FTD-associated FUS activates GSK-3 $\beta$  to disrupt the VAPB-PTPIP51 interaction and ER-mitochondria associations. *EMBO Rep.* 17, 1326–1342.
  13. Galmes, R., Houcine, A., van Vliet, A.R., Agostinis, P., Jackson, C.L., and Giordano, F. (2016). ORP5/ORP8 localize to endoplasmic reticulum-mitochondria contacts and are involved in mitochondrial function. *EMBO Rep.* 17, 800–810.
  14. Klionsky, D.J., Abdelmohsen, K., Abe, A., Abedin, M.J., Abeliovich, H., Acevedo Arizena, A., Adachi, H., Adams, C.M., Adams, P.D., Adeli, K., et al. (2016). Guidelines for the use and interpretation of assays for monitoring autophagy (3rd edition). *Autophagy* 12, 1–222.
  15. Hamasaki, M., Furuta, N., Matsuda, A., Nezu, A., Yamamoto, A., Fujita, N., Oomori, H., Noda, T., Haraguchi, T., Hiraoka, Y., et al. (2013). Autophagosomes form at ER-mitochondria contact sites. *Nature* 495, 389–393.
  16. Eskelinen, E.L. (2008). To be or not to be? Examples of incorrect identification of autophagic compartments in conventional transmission electron microscopy of mammalian cells. *Autophagy* 4, 257–260.
  17. Rubinsztein, D.C., Cuervo, A.M., Ravikumar, B., Sarkar, S., Korolchuk, V., Kaushik, S., and Klionsky, D.J. (2009). In search of an “autophagometer”. *Autophagy* 5, 585–589.
  18. Ravikumar, B., Berger, Z., Vacher, C., O’Kane, C.J., and Rubinsztein, D.C. (2006). Rapamycin pre-treatment protects against apoptosis. *Hum. Mol. Genet.* 15, 1209–1216.
  19. Schenone, S., Brullo, C., Musumeci, F., Radi, M., and Botta, M. (2011). ATP-competitive inhibitors of mTOR: an update. *Curr. Med. Chem.* 18, 2995–3014.
  20. Garofalo, T., Matarrese, P., Manganelli, V., Marconi, M., Tinari, A., Gambardella, L., Faggioni, A., Misasi, R., Sorice, M., and Malorni, W. (2016). Evidence for the involvement of lipid rafts localized at the ER-mitochondria associated membranes in autophagosome formation. *Autophagy* 12, 917–935.
  21. Hailey, D.W., Rambold, A.S., Satpute-Krishnan, P., Mitra, K., Sougrat, R., Kim, P.K., and Lippincott-Schwartz, J. (2010). Mitochondria supply membranes for autophagosome biogenesis during starvation. *Cell* 141, 656–667.
  22. Söderberg, O., Gullberg, M., Jarvius, M., Ridderstråle, K., Leuchowius, K.J., Jarvius, J., Wester, K., Hydbring, P., Bahram, F., Larsson, L.G., and Landegren, U. (2006). Direct observation of individual endogenous protein complexes in situ by proximity ligation. *Nat. Methods* 3, 995–1000.
  23. Hedskog, L., Pinho, C.M., Filadi, R., Rönnbäck, A., Hertwig, L., Wiehager, B., Larssen, P., Gellhaar, S., Sandebring, A., Westerlund, M., et al. (2013). Modulation of the endoplasmic reticulum-mitochondria interface in Alzheimer’s disease and related models. *Proc. Natl. Acad. Sci. USA* 110, 7916–7921.
  24. Vicencio, J.M., Ortiz, C., Criollo, A., Jones, A.W., Kepp, O., Galluzzi, L., Joza, N., Vitale, I., Morselli, E., Tailler, M., et al. (2009). The inositol 1,4,5-trisphosphate receptor regulates autophagy through its interaction with Beclin 1. *Cell Death Differ.* 16, 1006–1017.
  25. Wong, A., Grubb, D.R., Cooley, N., Luo, J., and Woodcock, E.A. (2013). Regulation of autophagy in cardiomyocytes by Ins(1,4,5)P(3) and IP(3)-receptors. *J. Mol. Cell. Cardiol.* 54, 19–24.
  26. Khan, M.T., and Joseph, S.K. (2010). Role of inositol trisphosphate receptors in autophagy in DT40 cells. *J. Biol. Chem.* 285, 16912–16920.
  27. Criollo, A., Maiuri, M.C., Tasdemir, E., Vitale, I., Fiebig, A.A., Andrews, D., Molgó, J., Díaz, J., Lavandero, S., Harper, F., et al. (2007). Regulation of autophagy by the inositol trisphosphate receptor. *Cell Death Differ.* 14, 1029–1039.
  28. Cárdenas, C., Miller, R.A., Smith, I., Bui, T., Molgó, J., Müller, M., Vais, H., Cheung, K.H., Yang, J., Parker, I., et al. (2010). Essential regulation of cell bioenergetics by constitutive InsP3 receptor Ca<sup>2+</sup> transfer to mitochondria. *Cell* 142, 270–283.
  29. Sarkar, S., Floto, R.A., Berger, Z., Imarisio, S., Cordenier, A., Pasco, M., Cook, L.J., and Rubinsztein, D.C. (2005). Lithium induces autophagy by inhibiting inositol monophosphatase. *J. Cell Biol.* 170, 1101–1111.
  30. Gunter, T.E., and Pfeiffer, D.R. (1990). Mechanisms by which mitochondria transport calcium. *Am. J. Physiol.* 258, C755–C786.
  31. Cárdenas, C., Müller, M., McNeal, A., Lovy, A., Jaña, F., Bustos, G., Urra, F., Smith, N., Molgó, J., Diehl, J.A., et al. (2016). Selective vulnerability of cancer cells by inhibition of Ca(2+) transfer from endoplasmic reticulum to mitochondria. *Cell Rep.* 15, 219–220.
  32. Mallilankaraman, K., Cárdenas, C., Doonan, P.J., Chandramoorthy, H.C., Irrinki, K.M., Golenár, T., Csordás, G., Madireddi, P., Yang, J., Müller, M., et al. (2012). MCUR1 is an essential component of mitochondrial Ca<sup>2+</sup> uptake that regulates cellular metabolism. *Nat. Cell Biol.* 14, 1336–1343.
  33. Tan, C., Lai, S., Wu, S., Hu, S., Zhou, L., Chen, Y., Wang, M., Zhu, Y., Lian, W., Peng, W., et al. (2010). Nuclear permeable ruthenium(II)  $\beta$ -carboline complexes induce autophagy to antagonize mitochondrial-mediated apoptosis. *J. Med. Chem.* 53, 7613–7624.
  34. Wu, W., Lin, C., Wu, K., Jiang, L., Wang, X., Li, W., Zhuang, H., Zhang, X., Chen, H., Li, S., et al. (2016). FUNDC1 regulates mitochondrial dynamics at the ER-mitochondrial contact site under hypoxic conditions. *EMBO J.* 35, 1368–1384.
  35. Böckler, S., and Westermann, B. (2014). Mitochondrial ER contacts are crucial for mitophagy in yeast. *Dev. Cell* 28, 450–458.
  36. de Brito, O.M., and Scorrano, L. (2008). Mitofusin 2 tethers endoplasmic reticulum to mitochondria. *Nature* 456, 605–610.
  37. Simmen, T., Aslan, J.E., Blagoveshchenskaya, A.D., Thomas, L., Wan, L., Xiang, Y., Feliciangeli, S.F., Hung, C.H., Crump, C.M., and Thomas, G. (2005). PACS-2 controls endoplasmic reticulum-mitochondria communication and Bid-mediated apoptosis. *EMBO J.* 24, 717–729.
  38. Naon, D., Zaninello, M., Giacomello, M., Varanita, T., Grespi, F., Lakshminarayanan, S., Serafini, A., Semenzato, M., Herkenne, S., Hernández-Alvarez, M.I., et al. (2016). Critical reappraisal confirms that Mitofusin 2 is an endoplasmic reticulum-mitochondria tether. *Proc. Natl. Acad. Sci. USA* 113, 11249–11254.
  39. Cosson, P., Marchetti, A., Ravazzola, M., and Orci, L. (2012). Mitofusin-2 independent juxtaposition of endoplasmic reticulum and mitochondria: an ultrastructural study. *PLoS ONE* 7, e46293.
  40. Filadi, R., Greotti, E., Turacchio, G., Luini, A., Pozzan, T., and Pizzo, P. (2015). Mitofusin 2 ablation increases endoplasmic reticulum-mitochondria coupling. *Proc. Natl. Acad. Sci. USA* 112, E2174–E2181.
  41. Wang, P.T., Garcin, P.O., Fu, M., Masoudi, M., St-Pierre, P., Panté, N., and Nabi, I.R. (2015). Distinct mechanisms controlling rough and smooth endoplasmic reticulum contacts with mitochondria. *J. Cell Sci.* 128, 2759–2765.
  42. Leal, N.S., Schreiner, B., Pinho, C.M., Filadi, R., Wiehager, B., Karlström, H., Pizzo, P., and Ankarcrona, M. (2016). Mitofusin-2 knockdown increases ER-mitochondria contact and decreases amyloid  $\beta$ -peptide production. *J. Cell. Mol. Med.* 20, 1686–1695.
  43. Filadi, R., Greotti, E., Turacchio, G., Luini, A., Pozzan, T., and Pizzo, P. (2016). Presenilin 2 modulates endoplasmic reticulum-mitochondria coupling by tuning the antagonistic effect of Mitofusin 2. *Cell Rep.* 15, 2226–2238.
  44. Youker, R.T., Shinde, U., Day, R., and Thomas, G. (2009). At the crossroads of homeostasis and disease: roles of the PACS proteins in membrane traffic and apoptosis. *Biochem. J.* 421, 1–15.
  45. Atkins, K.M., Thomas, L.L., Barroso-González, J., Thomas, L., Auclair, S., Yin, J., Kang, H., Chung, J.H., Dikeakos, J.D., and Thomas, G. (2014). The multifunctional sorting protein PACS-2 regulates SIRT1-mediated deacetylation of p53 to modulate p21-dependent cell-cycle arrest. *Cell Rep.* 8, 1545–1557.
  46. Cárdenas, C., and Foskett, J.K. (2012). Mitochondrial Ca(2+) signals in autophagy. *Cell Calcium* 52, 44–51.

47. Pedro, J.M., Wei, Y., Sica, V., Maiuri, M.C., Zou, Z., Kroemer, G., and Levine, B. (2015). BAX and BAK1 are dispensable for ABT-737-induced dissociation of the BCL2-BECN1 complex and autophagy. *Autophagy* 11, 452–459.
48. Decuyper, J.P., Welkenhuyzen, K., Luyten, T., Ponsaerts, R., Dewaele, M., Molgó, J., Agostinis, P., Missiaen, L., De Smedt, H., Parys, J.B., and Bultynck, G. (2011). Ins(1,4,5)P3 receptor-mediated Ca<sup>2+</sup> signaling and autophagy induction are interrelated. *Autophagy* 7, 1472–1489.
49. Schon, E.A., and Area-Gomez, E. (2013). Mitochondria-associated ER membranes in Alzheimer disease. *Mol. Cell. Neurosci.* 55, 26–36.
50. Krols, M., van Isterdael, G., Asselbergh, B., Kremer, A., Lippens, S., Timmerman, V., and Janssens, S. (2016). Mitochondria-associated membranes as hubs for neurodegeneration. *Acta Neuropathol.* 131, 505–523.



**Current Biology, Volume 27**

**Supplemental Information**

**The ER-Mitochondria Tethering Complex**

**VAPB-PTPIP51 Regulates Autophagy**

**Patricia Gomez-Suaga, Sebastien Paillusson, Radu Stoica, Wendy Noble, Diane P. Hanger, and Christopher C.J. Miller**

## Supplemental Figures

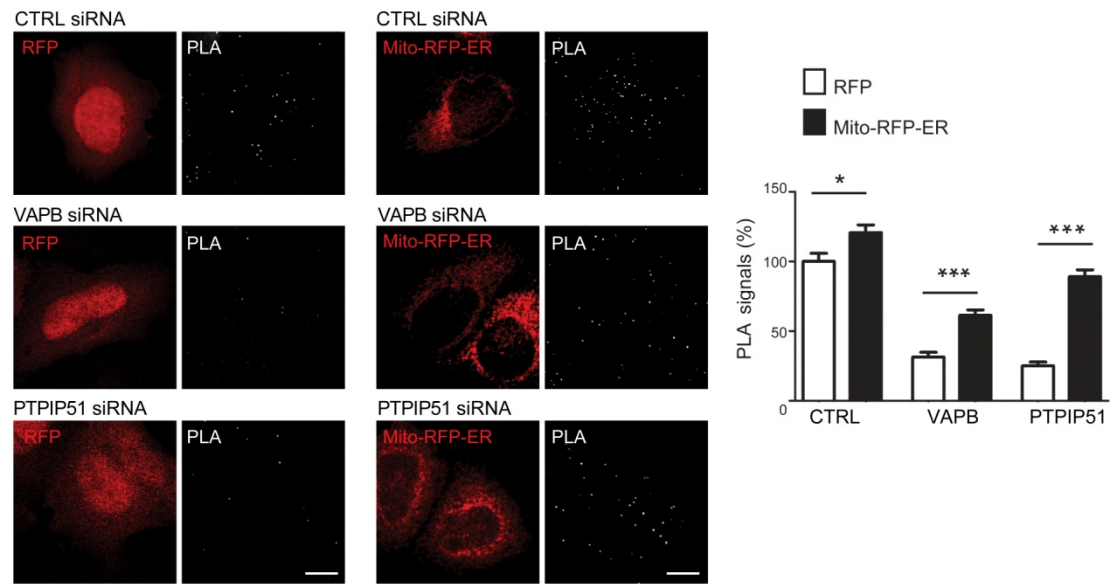

**Figure S1 (related to Figure 5). Expression of the artificial ER-mitochondria tethering protein Mito-RFP-ER increases IP3 receptor3-VDAC1 interactions.** HeLa cells were treated with either control (CTRL), VAPB or PTPIP51 siRNAs and then transfected with either control RFP (left panel) or Mito-RFP-ER (right panel) plasmids. Proximity ligation assays (PLA) for IP3 receptor3-VDAC1 interactions were then performed. Representative confocal images of the different transfected cells are shown along with PLA signals. Scale bars are 10 μm. Bar chart shows quantification of PLA signals. Data were analysed by Students T test. N=45-160 cells per condition from 3-4 independent experiments. Error bars are s.e.m.; \*p < 0.05; \*\*\*p < 0.001.

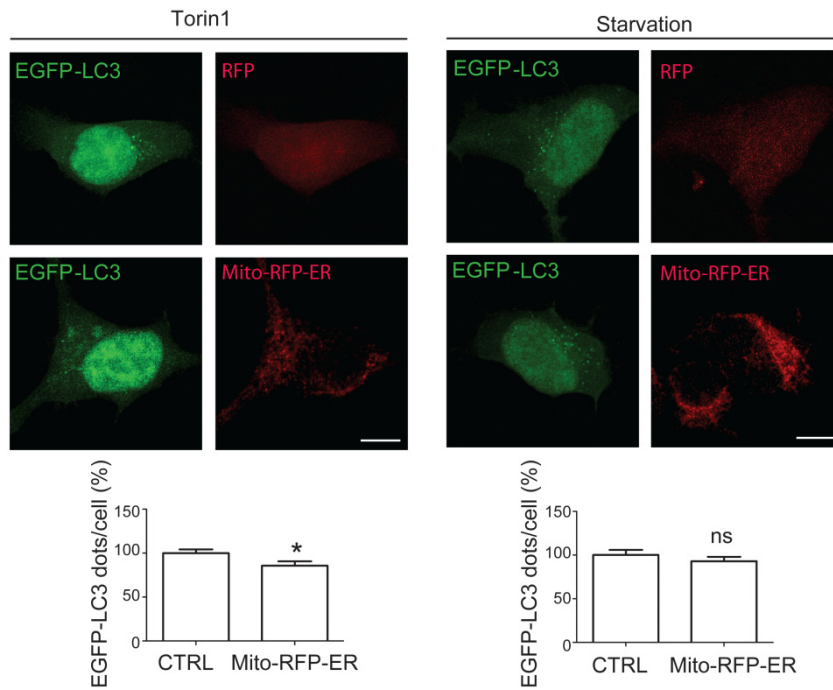

**Figure S2 (related to Figure 4). Expression of the artificial ER-mitochondria tethering protein Mito-RFP-ER reduces the numbers of EGFP-LC3 autophagic structures in HEK293 cells undergoing autophagy induced by Torin 1 but not starvation.** Representative images of cells co-transfected with EGFP-LC3 and either RFP control or Mito-RFP-ER, and then treated with Torin 1 or starvation as indicated. Scale bars are 10  $\mu$ m. Bar charts show relative numbers (%) of EGFP-LC3 dots per cell in the different conditions. Data were analysed by Student's T test. N=70-107 cells per condition from 3 independent experiments. Error bars are s.e.m.; \* $p \leq 0.05$ ; ns not significant.

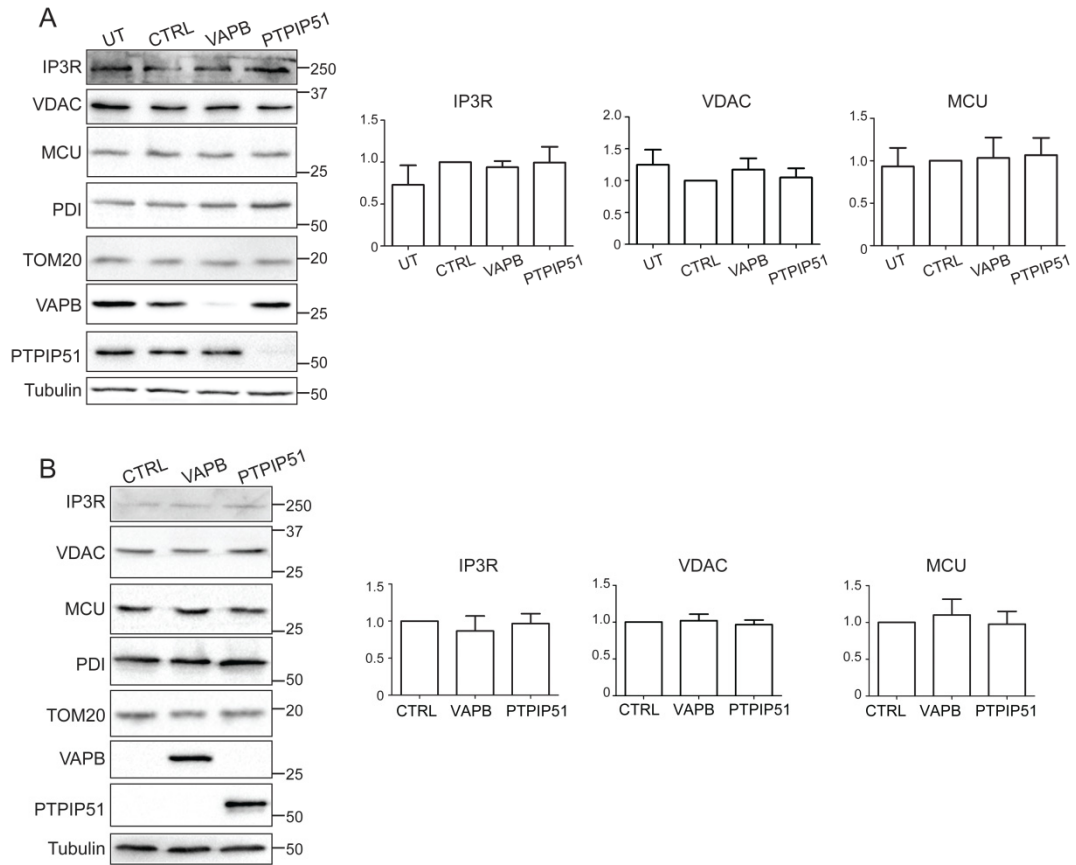

**Figure S3 (related to Figure 6). siRNA loss and overexpression by transfection of VAPB or PTPIP51 do not alter expression of the IP3 receptor (IP3R), VDAC or the mitochondrial  $\text{Ca}^{2+}$  uniporter (MCU).** Immunoblots for IP3R, VDAC, MCU, VAPB, PTPIP51 along with loading controls for ER (PDI), mitochondria (TOM20) and  $\alpha$ -tubulin are shown. (A) shows cells either untreated (UT) or treated with control, VAPB or PTPIP51 siRNAs. (B) shows cells transfected with either CTRL vector, myc-VAPB or HA-PTPIP51. In (B) VAPB and PTPIP51 were detected via their epitope tags. Molecular mass markers are indicated in kD. Bar charts show relative levels of IP3 receptor, VDAC and MCU after normalization of signals. IP3R was normalized to PDI and VDAC and MCU were normalized to TOM20 signals. Data were analysed by one-way analysis of variance; no significant changes in the levels of IP3R, VDAC or MCU were detected in either the VAPB/PTPIP51 siRNA knockdown or transfected cells compared to controls. N=3-4. Error bars are s.e.m.

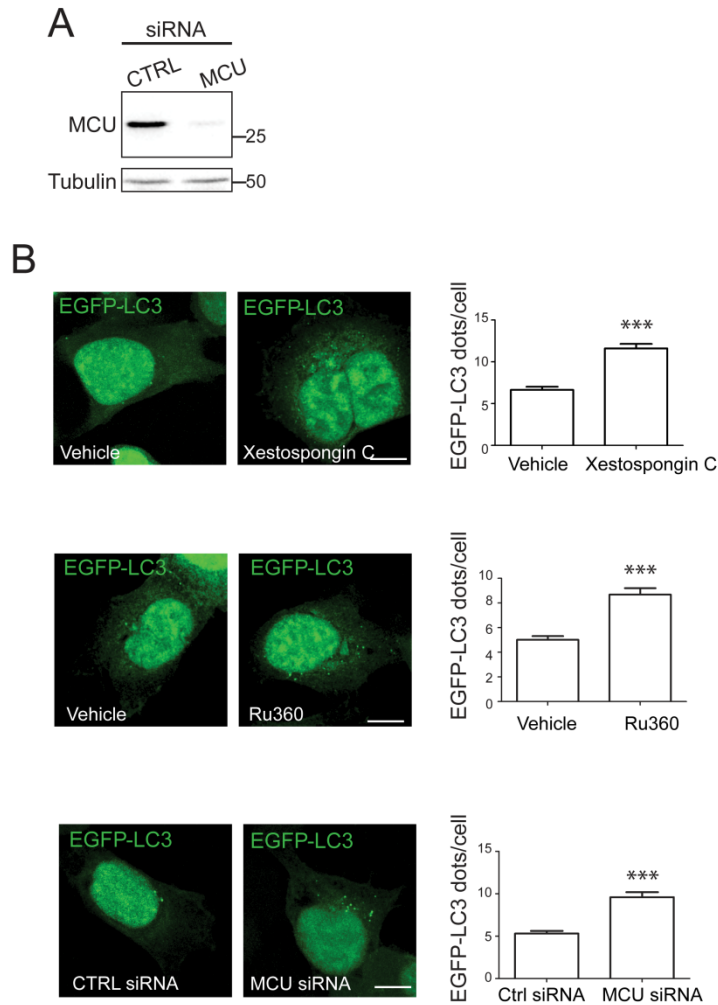

**Figure S4, (related to Figure 7). Inhibiting IP<sub>3</sub> receptor-mediated Ca<sup>2+</sup> delivery to mitochondria with Xestospongine C, Ruthenium-360 or siRNA knockdown of the mitochondrial Ca<sup>2+</sup> uniporter (MCU) stimulates autophagosome formation.** (A) siRNA knockdown of MCU. HEK293 cells were treated with control (CTRL) or MCU siRNAs and the samples probed on immunoblots for MCU and  $\alpha$ -tubulin as a loading control. (B) Representative images of HEK293 cells transfected with EGFP-LC3 and then treated with either vehicle, Xestospongine C or Ruthenium-360, or treated with control or MCU siRNAs and then transfected with EGFP-LC3. Scale bars are 10  $\mu$ m. Bar charts show numbers of EGFP-LC3 dots per cell in the different conditions. Data were analysed by Students T test. N=151-188 cells in 3 independent experiments. Error bars are s.e.m; \*\*\*p $\leq$ 0.001.

## **Experimental Procedures**

### Plasmid and siRNAs

Mammalian expression vectors for Myc and CFP-tagged VAPB, hemagglutinin (HA) and EGFP-tagged PTP51, and the M3 muscarinic receptor were as described [S1, S2]. pMXs-puro EGFP-DFCP1 was a gift from Noboru Mizushima (Addgene plasmid # 38269), pEGFP-HDQ74 (Addgene plasmid # 40262) and EGFP-LC3 were gifts from David Rubinsztein. The outer mitochondrial membrane-ER linker plasmid (mAKAP1-mRFP-yUBC6; named Mito-RFP-ER here) was a gift from Gyorgy Hajnoczky [S3]. RFP was from Clontech. Human control, VAPB and PTP51 siRNAs were as described [S1, S2]. siRNAs for the mitochondrial Ca<sup>2+</sup> uniporter were an “ON TARGET plus SMART pool” of GAUCAGGCAUUGUGGAAUA, GUUUUGACCUAGAGAAAUA, ACUGAGAGACCAUUAACA and GUAAUGACACGCCAGGAAU; (siRNA J-015519-17 MCU). All siRNAs were from GE Healthcare Dharmacon.

### Antibodies and other reagents

Rabbit antibody to VAPB has been described and was generated by immunization with GST-VAPB (1–220) [S1]. Rabbit anti-PTP51 was from Atlas. Rabbit anti-haemagglutinin (HA) and mouse anti- $\alpha$ -tubulin (DM1A) were from Sigma. Rabbit anti-LC3, mouse anti-Myc and rabbit anti VDAC were from Cell Signaling Technology. Rabbit anti-ULK1, rabbit anti-translocase of the outer membrane-20 (TOM20) and goat anti VDAC1 were from Santa Cruz Biotechnology. Rabbit anti-ATG5 was from Novus Biologicals. Rabbit anti-IP3 receptor3 was from Millipore. Mouse anti protein disulphide isomerase (PDI) was from Affinity Bioreagents. Secondary antibodies for immunoblotting were horseradish peroxidase-coupled goat anti-mouse and anti-rabbit Igs (GE Healthcare Life Sciences, Piscataway, NJ). Alexa fluorophore (488 and 594)-coupled goat anti-mouse and goat anti-rabbit Igs used for immunofluorescence microscopy were purchased from Invitrogen (Grand Island, NY). Bafilomycin A1 and Xestospongine C were from Sigma; Rapamycin and Torin-1 from were from Biovision, Ruthenium-360 was from Millipore and oxotremorine-M was from Tocris. Oxotremorine-M and Ruthenium-360 were dissolved in water, Rapamycin was dissolved in ethanol and Bafilomycin A1, Torin-1 and Xestospongine C were dissolved in DMSO.

### Cell culture and transfection

HeLa and HEK293 cells were cultured in DMEM high glucose (GE Healthcare Life Sciences) (4.5g/l) supplemented with 10% heat-inactivated foetal bovine serum (LabTech International), penicillin (100 units/ml) and streptomycin (100 units/ml), 2 mM glutamine (Invitrogen) and non-essential amino acids (Sigma). Cells were transfected with plasmids using Fugene-6 (Promega) and siRNAs using Oligofectamine (ThermoFisher Scientific) according to the manufacturer’s instructions. Briefly, cells were plated in 12 well plates and transfected 24 h later with 1  $\mu$ g of the plasmid of interest or 100 nM siRNAs. For double transfections, 0.5  $\mu$ g of each plasmid was used. Transfected cells were analysed 24 h and siRNA treated cells 72 h post transfection. For experiments involving Mito-RFP-ER, cells were transfected with 0.2  $\mu$ g of each plasmid and analysed 16 h post transfection. For induction of autophagy, cells were treated with 100 nM Rapamycin for 12 hours or 500 nM Torin-1 for 1 hour. Starvation induced autophagy involved culture in Earle’s balanced salt solution (EBSS) (Sigma) for 2h. For autophagy flux assays, cells were treated with 400 nM Bafilomycin A1 for 4 hours. Cells were treated with 2  $\mu$ M Xestospongine C for 12 h and 5  $\mu$ M Ruthenium-360 for 2 h. EGFP-LC3 stably transfected HeLa were generated by selection with 1 mg/ml G418 (Sigma) for 28 days.

### SDS-PAGE and immunoblotting

Cells were harvested by washing in ice-cold phosphate buffered saline (PBS) and then scraped into PBS containing 1% SDS with protease inhibitors (Complete Roche), 1 mM Na<sub>3</sub>VO<sub>4</sub> and 5 mM NaF. Extracts were then heated for 5 min at 100°C, sonicated and centrifuged at 10000 g (av) for 10 min. Protein concentrations were determined using a commercial BCA assay (Pierce). Samples were prepared for SDS-PAGE by addition of sample buffer and then resolved on 10 or 15 % SDS-PAGE gels, and transferred to nitrocellulose membranes (Schleicher & Schuell Bioscience) by wet electroblotting (BioRad). Membranes were blocked with Tris-HCl-buffered saline (TBS) containing 5% dried milk and 0.1% Tween-20 for 1 h at 20°C, and then incubated with primary antibodies in TBS containing 5% bovine serum albumin/0.1% Tween-20 for 16 hours at 4°C. Following washing in TBS containing 0.1% Tween-20, the blots were incubated with horseradish peroxidase conjugated secondary antibodies and developed using chemiluminescence with a Luminata Forte Western HRP substrate system according to the manufacturer’s instructions (Millipore). Detection of chemiluminescence signals was by using a BioRad ChemiDoc MP Imaging system or X-ray films.

Signals on films were quantified using ImageJ after scanning with an Epson Precision V700 Photo scanner essentially as described by us in previous studies [S4].

#### Immunofluorescence microscopy

Cells grown on coverslips were fixed for 15 min at 20°C with 4% (w/v) paraformaldehyde in PBS and then permeabilized with PBS containing 0.5% Triton X-100 for 15 minutes. Samples were then preincubated with blocking buffer (PBS containing 2% horse serum and 0.5% Triton X-100) for 1 hour and incubated with primary antibodies diluted in blocking buffer for 1 hour. Following washing in PBS containing 0.5% Triton X-100, the samples were incubated with goat anti-rabbit or goat anti-mouse AlexaFluor-488 or -594-conjugated Igs in PBS for 1 hour, washed in PBS and then mounted in Vectashield mounting medium containing DAPI (Vector Laboratories).

Proximity ligation assays to quantify IP3 receptor3-VDAC1 interactions were performed essentially as described previously [S1] using Duolink reagents (Sigma-Aldrich). Cells were fixed in 4% paraformaldehyde in PBS and probed with rabbit IP3 receptor3 and goat anti-VDAC1 antibodies. Signals were developed using a Duolink In Situ Far Red kit and quantified using NIH ImageJ.

Images were acquired using a Leica TCS-SP5 confocal microscope using a  $\times 63$ HXC PL APO lambda blue CS 1.4 oil UV objective. Images were collected using single excitation for each wavelength separately (488 nm Argon Laser line and a 500–545 nm emission band pass; 561 nm DPSS Laser line and a 585–690 nm emission band pass; 405 nm UV diode and a 422–470 nm emission band pass). Ten to fifteen image sections of selected areas were acquired using a pinhole size of one Airy unit. Z-stack images were analysed and processed using Leica Applied Systems (LAS AF6000) image acquisition software. The same laser intensity was used for image acquisition in each experiment. Conventional wide-field immunofluorescence microscopy was performed with a Leica DM5000B microscope equipped with  $63\times/1.25$ NA HCX-PL-FLUOTAR objectives and appropriate filtersets (Leica Microsystems).

#### Quantitative image analysis

EGFP-LC3 and EGFP-DFCP1 structures in cells were quantified essentially as previously described [S5]. For HeLa cells a threshold of 20 dots/cell was established using control treatments that effectively distinguishes “autophagy active” and “autophagy inactive” as described [S6]. Hence, the percentage of cells displaying more than 20 punctae were quantified; see [S6]. EGFP-HDQ74 aggregation was quantified by determining the proportion of EGFP-HDQ74 transfected cells that contained aggregates again as previously described [S7]. In this assay, cells were excluded from quantification if the DAPI-stained nuclei showed apoptotic morphology (fragmentation or pyknosis). Proximity ligation assays signals, ULK1 and ATG5 structures were analysed using NIH ImageJ macro “EGFP-LC3” [S8].

#### Ca<sup>2+</sup> measurements

Ca<sup>2+</sup> measurements were performed essentially as described previously [S1, S2, S9]. HEK293 cells were transfected with M3R plus experimental plasmids for 24 h and then loaded with 2  $\mu$ M Rhod2-AM or Fluo4-AM dye (Invitrogen) in external solution (145 mM NaCl, 2 mM KCl, 5 mM NaHCO<sub>3</sub>, 1 mM MgCl<sub>2</sub>, 2.5 mM CaCl<sub>2</sub>, 10 mM glucose, 10 mM Na-HEPES, pH 7.25) containing 0.02% Pluronic-F27 (Invitrogen) for 15 min at 37°C. Rhod2 and Fluo4 fluorescence were timelapse recorded (1s intervals) at 37°C with MetaMorph (Molecular Dynamics) on an Axiovert S100 microscope (Zeiss) equipped with DsRed (Rhod2) and GFP (Fluo4) filtersets (Chroma Technology), a 40x Plan-Neofluar 1.3NA objective (Zeiss), and a Photometrics Cascade-II 512B36 EMCCD camera. Some experiments were also performed using a Nikon Eclipse TiE microscope with a CFI Plan Fluor 40x oil N.A. 1.30 W.D. 0.2 mm spring loaded lens, TiND6 PFS-S Perfect Focus Unit, Chroma filtersets and Bio-Logic MSC-200 fast perfusion system; images were acquired using an Andor Neo sCMOS camera and data analysed using Nikon proprietary software. The cells were kept under constant perfusion with external solution (0.5 ml min<sup>-1</sup>). IP3 receptor-mediated Ca<sup>2+</sup> release from ER stores was triggered by application of 100  $\mu$ M oxotremorine-M for 2 min. Mitochondrial calcium levels were then calculated as relative Rhod2 or Fluo4 fluorescence compared to baseline fluorescence at the start of the measurement.

#### Electron microscopy

HeLa cells were fixed with 2% glutaraldehyde in 0.1 M sodium cacodylate buffer (pH 7.2) for 30 minutes and then harvested by scraping gently with a plastic scraper. The cells were pelleted by centrifugation at 800g (av) for 10 min and fixed for a further 2 hours in 2% glutaraldehyde in 0.1 M sodium cacodylate buffer. Following washing in buffer, the cells were post-fixed for 1 hour in 1%

osmium tetroxide in 0.1 M sodium cacodylate buffer. The cells were then stained for 1 hour with 1% uranyl acetate in water before dehydration and embedding in Taab resin. Sections were cut using a Reichert Ultra cut E ultramicrotome and stained for 6 minutes in 0.16% lead citrate in 0.1 M NaOH followed by 3 washes in water. Samples were viewed on a Tecnai 20 electron microscope at 4800X and 1900X magnification. Digital images were acquired and autophagic structures identified via morphology as described [S10]. Quantification of autophagic structures per cell area was performed using Image J (plug-in Grids and Cell Counter; NIH, Bethesda, MD, USA) using point counting as described [S11].

#### Statistical analyses

All experiments were repeated at least three times. Statistical analyses were performed with Prism 5.0 (GraphPad Software). For quantification of LC3-II levels, signals were normalized to  $\alpha$ -tubulin as a housekeeping loading control as recommended [S12].

#### References

- S1. De Vos, K.J., Morotz, G.M., Stoica, R., Tudor, E.L., Lau, K.F., Ackerley, S., Warley, A., Shaw, C.E., and Miller, C.C.J. (2012). VAPB interacts with the mitochondrial protein PTPIP51 to regulate calcium homeostasis. *Hum. Mol. Genet.* *21*, 1299-1311.
- S2. Stoica, R., De Vos, K.J., Paillusson, S., Mueller, S., Sancho, R.M., Lau, K.F., Vizcay-Barrena, G., Lin, W.L., Xu, Y.F., Lewis, J., et al. (2014). ER-mitochondria associations are regulated by the VAPB-PTPIP51 interaction and are disrupted by ALS/FTD-associated TDP-43. *Nat. Commun.* *5*, 3996.
- S3. Csordas, G., Renken, C., Varnai, P., Walter, L., Weaver, D., Buttle, K.F., Balla, T., Mannella, C.A., and Hajnoczky, G. (2006). Structural and functional features and significance of the physical linkage between ER and mitochondria. *J. Cell Biol.* *174*, 915-921.
- S4. Morotz, G.M., De Vos, K.J., Vagnoni, A., Ackerley, S., Shaw, C.E., and Miller, C.C.J. (2012). Amyotrophic lateral sclerosis-associated mutant VAPBP56S perturbs calcium homeostasis to disrupt axonal transport of mitochondria. *Hum. Mol. Genet.* *21*, 1979-1988.
- S5. Gomez-Suaga, P., Luzon-Toro, B., Churamani, D., Zhang, L., Bloor-Young, D., Patel, S., Woodman, P.G., Churchill, G.C., and Hilfiker, S. (2012). Leucine-rich repeat kinase 2 regulates autophagy through a calcium-dependent pathway involving NAADP. *Hum. Mol. Genet.* *21*, 511-525.
- S6. Mizushima, N., Yoshimori, T., and Levine, B. (2010). Methods in mammalian autophagy research. *Cell* *140*, 313-326.
- S7. Ravikumar, B., Imarisio, S., Sarkar, S., O'Kane, C.J., and Rubinsztein, D.C. (2008). Rab5 modulates aggregation and toxicity of mutant huntingtin through macroautophagy in cell and fly models of Huntington disease. *J. Cell Sci.* *121*, 1649-1660.
- S8. Dagda, R.K., Zhu, J., Kulich, S.M., and Chu, C.T. (2008). Mitochondrially localized ERK2 regulates mitophagy and autophagic cell stress: implications for Parkinson's disease. *Autophagy* *4*, 770-782.
- S9. Stoica, R., Paillusson, S., Gomez-Suaga, P., Mitchell, J.C., Lau, D.H., Gray, E.H., Sancho, R.M., Vizcay-Barrena, G., De Vos, K.J., Shaw, C.E., et al. (2016). ALS/FTD-associated FUS activates GSK-3 $\beta$  to disrupt the VAPB-PTPIP51 interaction and ER-mitochondria associations. *EMBO Rep.* *17*, 1326-1342.
- S10. Eskelinen, E.L. (2008). To be or not to be? Examples of incorrect identification of autophagic compartments in conventional transmission electron microscopy of mammalian cells. *Autophagy* *4*, 257-260.
- S11. Yla-Anttila, P., Vihinen, H., Jokitalo, E., and Eskelinen, E.L. (2009). Monitoring autophagy by electron microscopy in Mammalian cells. *Methods Enzymol.* *452*, 143-164.
- S12. Klionsky, D.J., Abdalla, F.C., Abeliovich, H., Abraham, R.T., Acevedo-Arozena, A., Adeli, K., Agholme, L., Agnello, M., Agostinis, P., Aguirre-Ghiso, J.A., et al. (2012). Guidelines for the use and interpretation of assays for monitoring autophagy. *Autophagy* *8*, 445-544.
